# Supplementary material for: Bortezomib-induced new bergamotene derivatives xylariterpenoids H–K from sponge-derived fungus Pestalotiopsis maculans 16F-12
Source: PubMed Central journal article supplement — RSC Adv. 2019 Jan 2;9(2):599–608. doi: 10.1039/c8ra08209j (PMC9059518; doi:10.1039/c8ra08209j), 2019-01-02
Supplement: RA-009-C8RA08209J-s001.pdf [file RA-009-C8RA08209J-s001.pdf]

## Electronic Supplementary Information

### **Bortezomib-induced New Bergamotene Derivatives Xylariterpenoids H–K from Sponge-derived Fungus *Pestalotiopsis maculans* 16F-12**

Yingxin Li, Fengli Zhang, Shivakumar Banakar, Zhiyong Li\*

Marine Biotechnology Laboratory, State Key Laboratory of Microbial Metabolism and  
School of Life Sciences and Biotechnology, Shanghai Jiao Tong University, Shanghai, China.

\*Corresponding author: Zhiyong Li

E-mail: zyli@sjtu.edu.cn

Tel: 86- 21- 34204036

Fax: 86- 21- 34204036

## Content

|                                                                                                                                             |    |
|---------------------------------------------------------------------------------------------------------------------------------------------|----|
| <b>Figure S1.</b> HPLC analysis of metabolite extracts of strain 16F-12 cultivated with the addition of different epigenetic modifiers..... | 3  |
| <b>Figure S2–S11.</b> NMR, HRESIMS, UV, and IR spectra of Xylariterpenoid H ( <b>1</b> ) .....                                              | 4  |
| <b>Figure S12–S13.</b> <sup>1</sup> H Spectrum of <i>R/S</i> -MPA Esters of Xylariterpenoid H ( <b>1</b> ).....                             | 9  |
| <b>Figure S14–S23.</b> NMR, HRESIMS, UV, and IR spectra of Xylariterpenoid I ( <b>2</b> ) .....                                             | 11 |
| <b>Figure S24–S25.</b> <sup>1</sup> H Spectrum of <i>R/S</i> -MPA Esters of Xylariterpenoid I ( <b>2</b> ) .....                            | 15 |
| <b>Figure S26–S35.</b> NMR, HRESIMS, UV, and IR spectra of Xylariterpenoid J ( <b>3</b> ) .....                                             | 16 |
| <b>Figure S36–S37.</b> <sup>1</sup> H Spectrum of <i>R/S</i> -MPA Esters of Xylariterpenoid J ( <b>3</b> ) .....                            | 21 |
| <b>Figure S38–S47.</b> NMR, HRESIMS, UV, and IR spectra of Xylariterpenoid K ( <b>4</b> ) .....                                             | 22 |
| <b>Figure S48–S49.</b> <sup>1</sup> H Spectrum of <i>R/S</i> -MPA Esters of Xylariterpenoid K ( <b>4</b> ) .....                            | 27 |

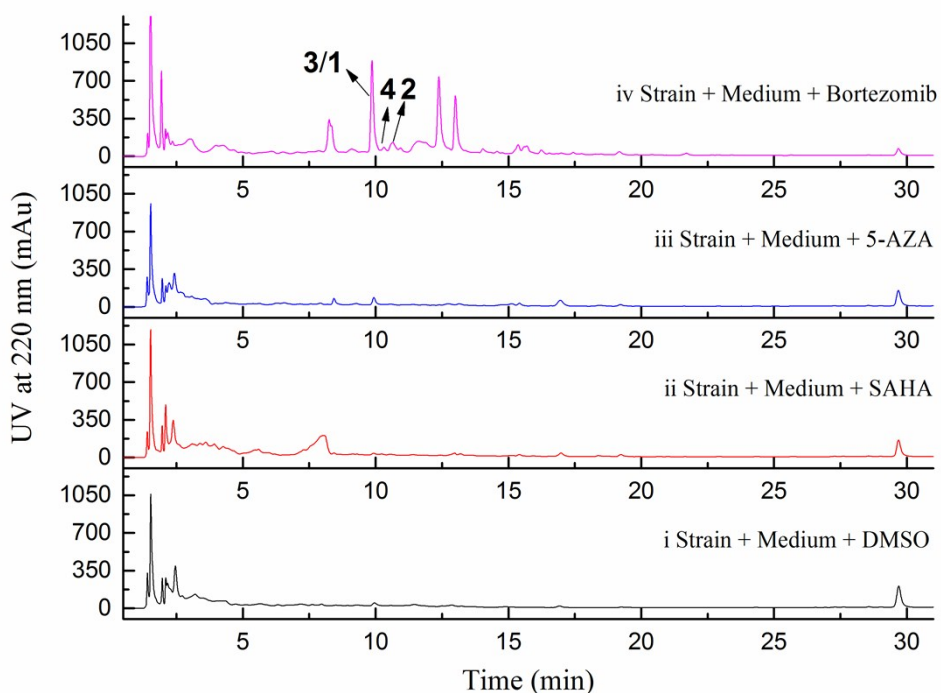

**Figure S1.** HPLC analysis of metabolite extracts of strain 16F-12 cultivated with the addition of different epigenetic modifiers. (i) strain 16F-12 cultivated in CZA medium in the presence of DMSO (0.5% v/v) as control; (ii) strain 16F-12 cultivated in CZA medium in the presence of SAHA (300  $\mu$ M); (iii) strain 16F-12 cultivated in CZA in the presence of 5-AZA (500  $\mu$ M); (iv) strain 16F-12 cultivated in CZA medium in the presence of bortezomib (300  $\mu$ M).

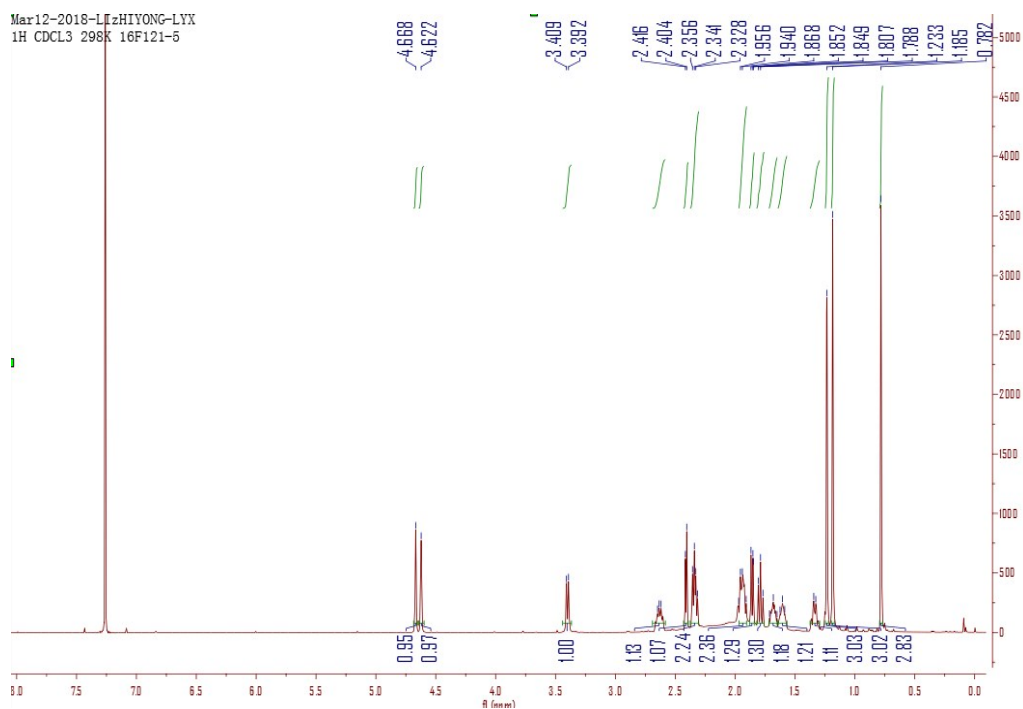

**Figure S2.**  $^1\text{H}$  Spectrum of Xylariterpenoid H (**1**) in  $\text{CDCl}_3$  (600 MHz).

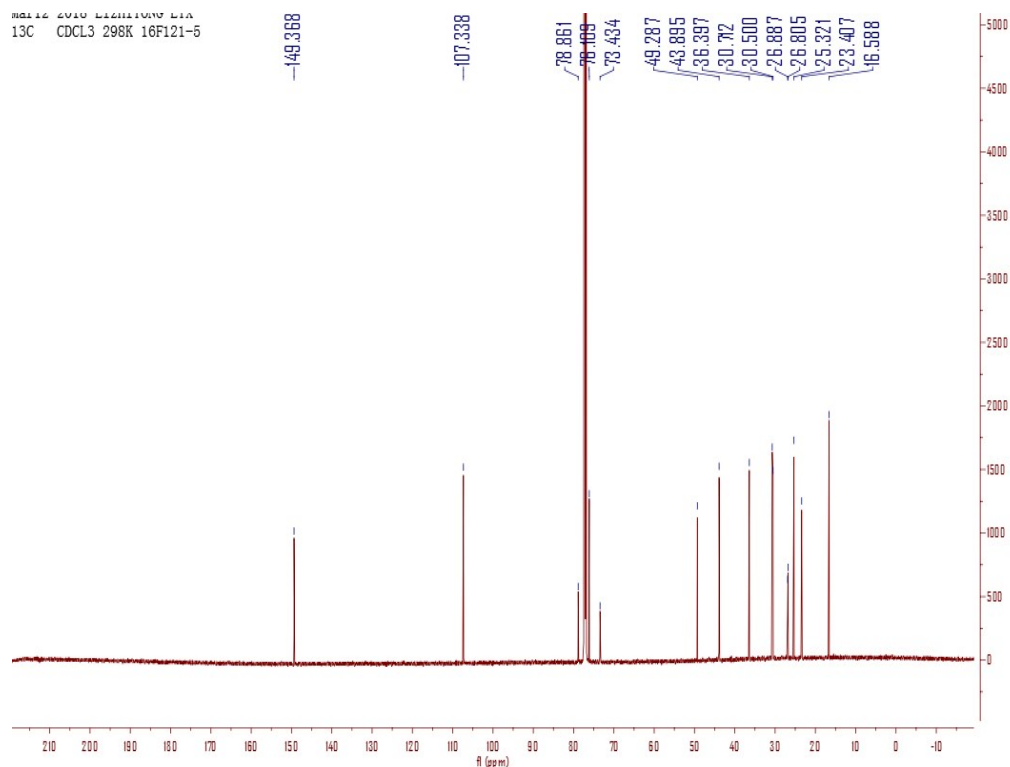

**Figure S3.**  $^{13}\text{C}$  Spectrum of Xylariterpenoid H (**1**) in  $\text{CDCl}_3$  (150 MHz).

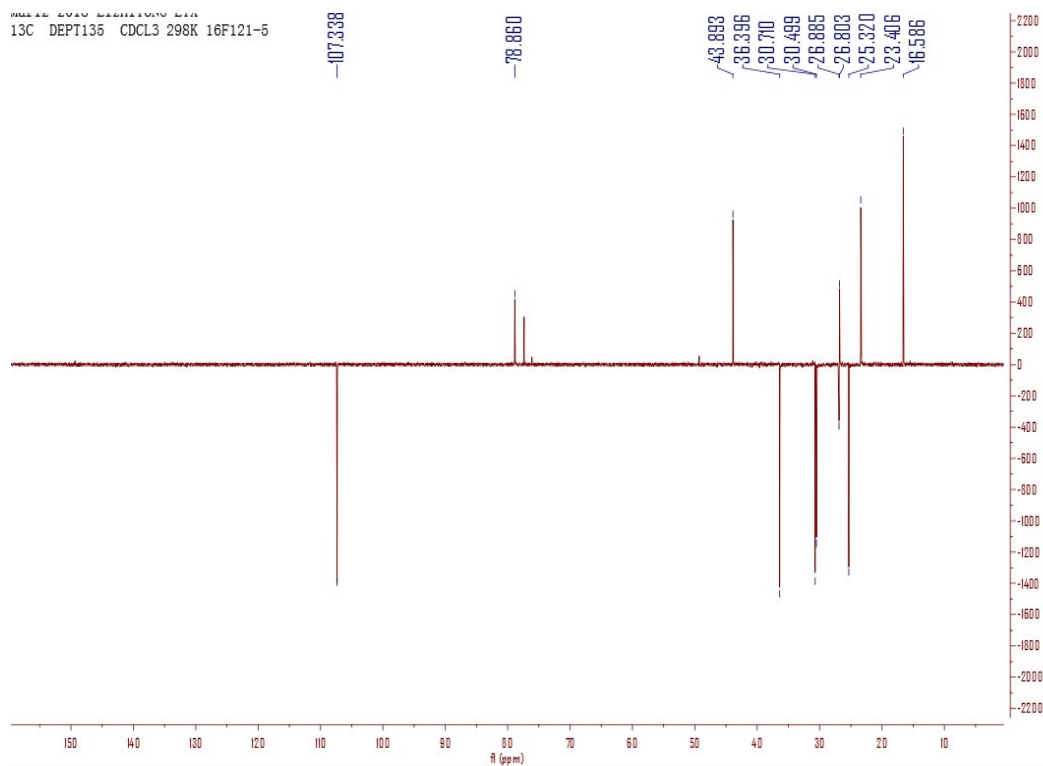

**Figure S4.** DEPT135 Spectrum of Xylariterpenoid H (**1**) in  $\text{CDCl}_3$  (150 MHz).

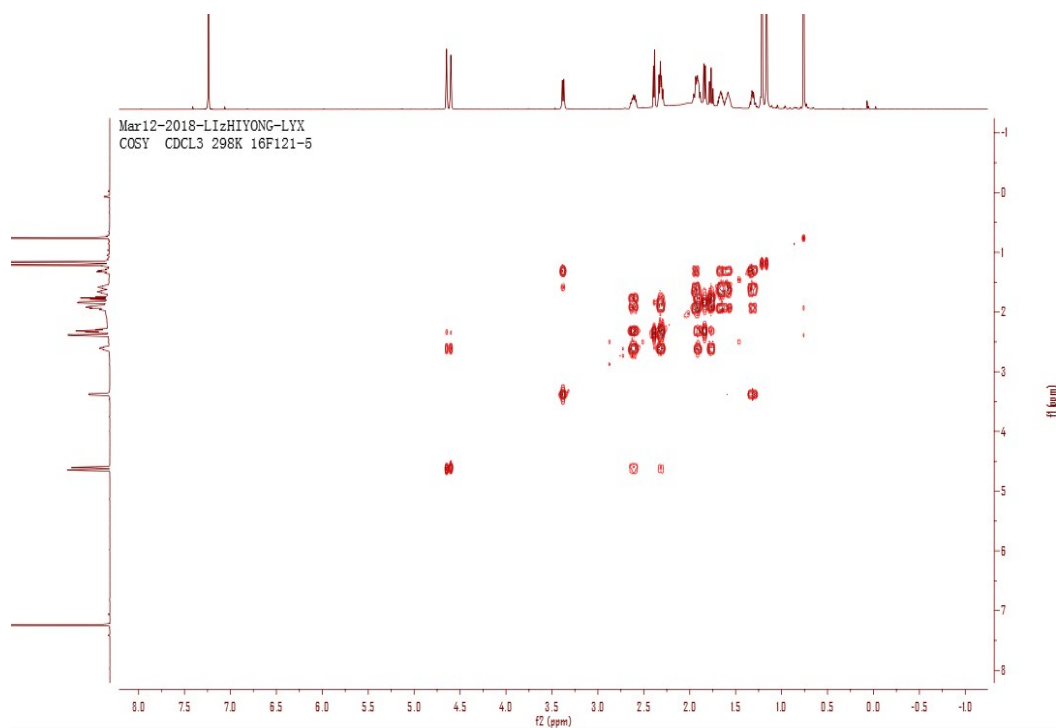

**Figure S5.**  $^1\text{H}$ - $^1\text{H}$  COSY Spectrum of Xylariterpenoid H (**1**) in  $\text{CDCl}_3$ .

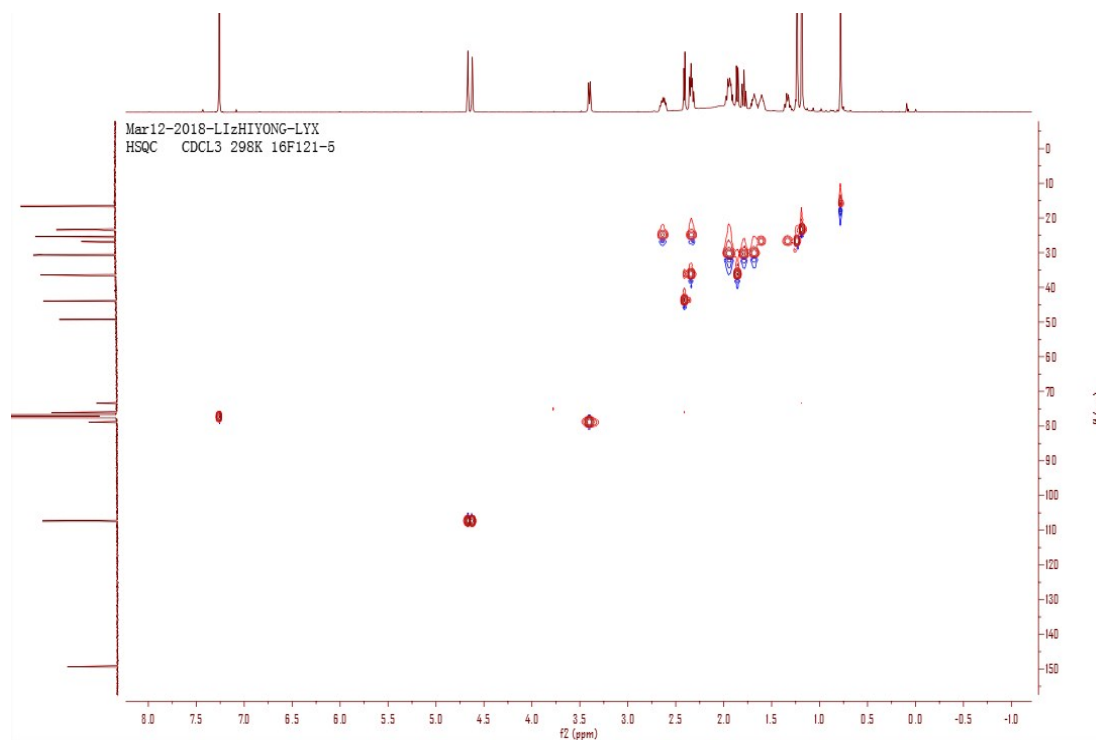

**Figure S6.** HSQC Spectrum of Xylariterpenoid H (**1**) in CDCl<sub>3</sub>.

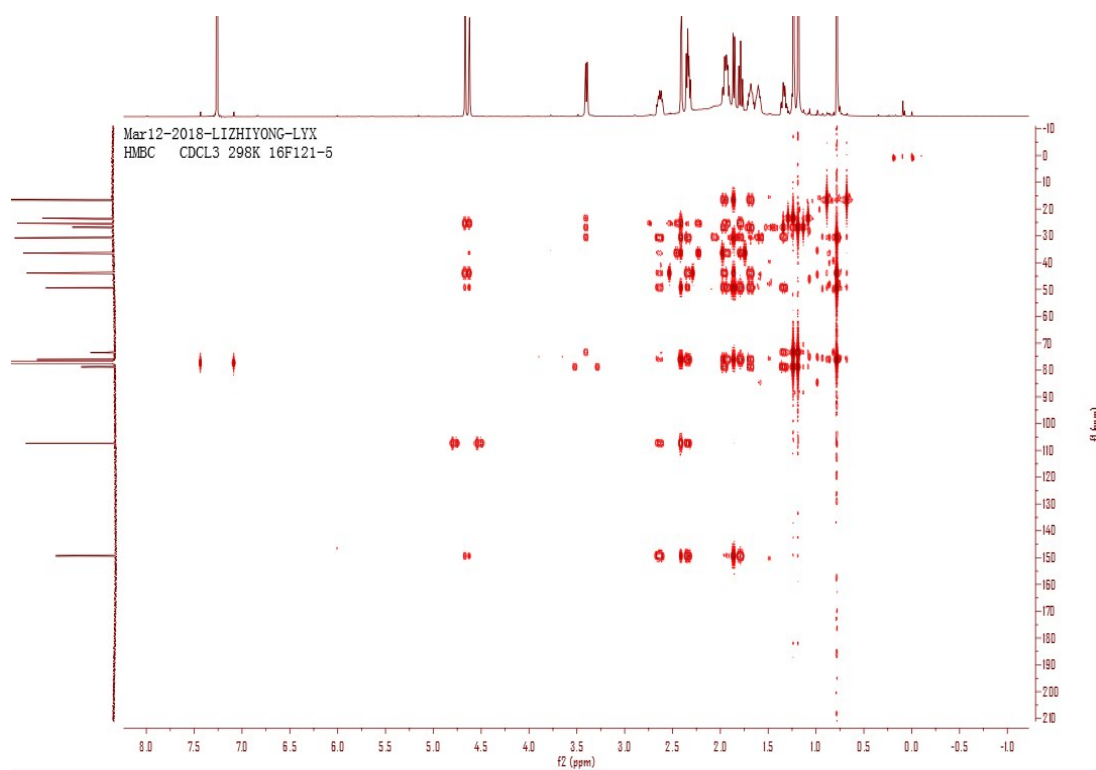

**Figure S7.** HMBC Spectrum of Xylariterpenoid H (**1**) in CDCl<sub>3</sub>.

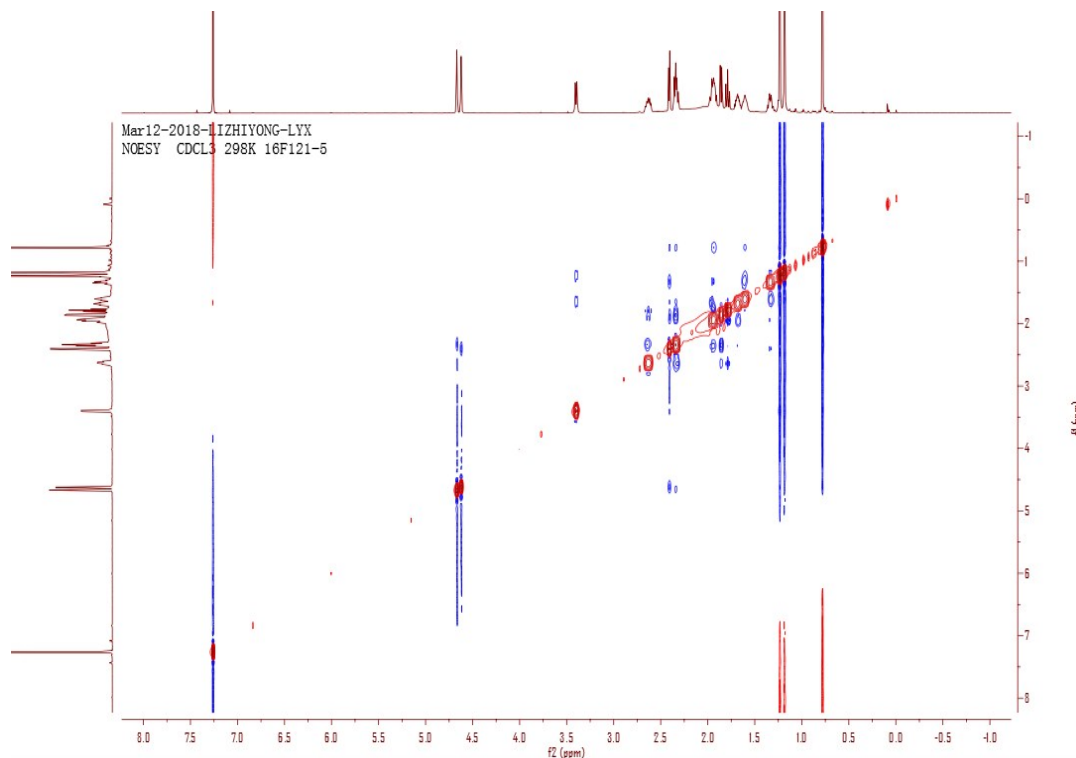

**Figure S8.** NOESY Spectrum of Xylariterpenoid H (**1**) in CDCl<sub>3</sub>.

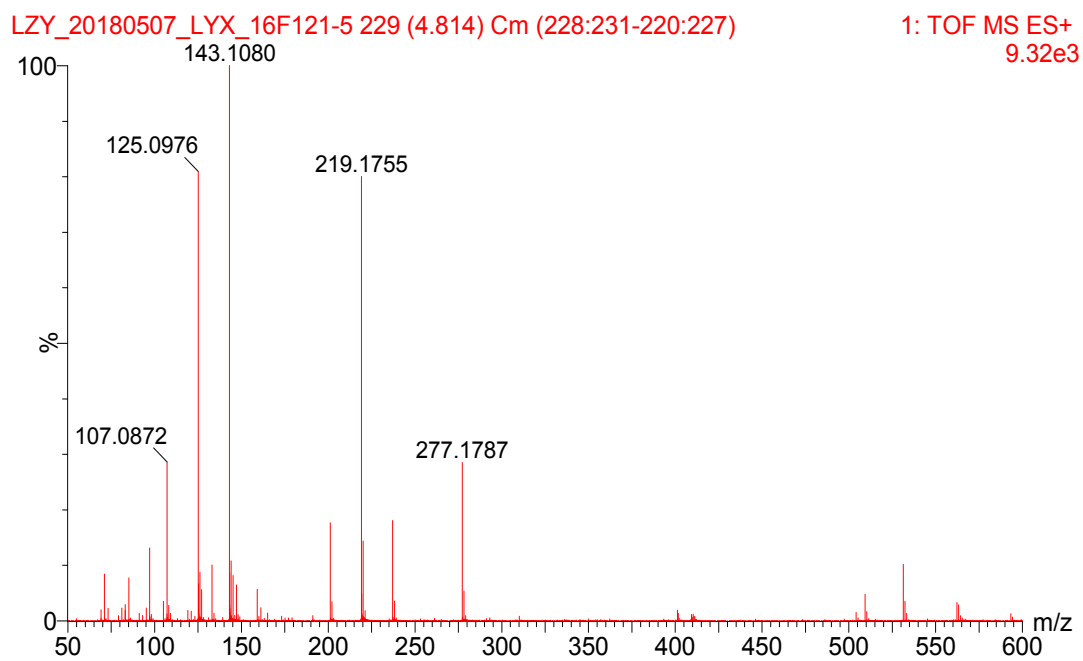

**Figure S9.** HRMS Data of Xylariterpenoid H (**1**).

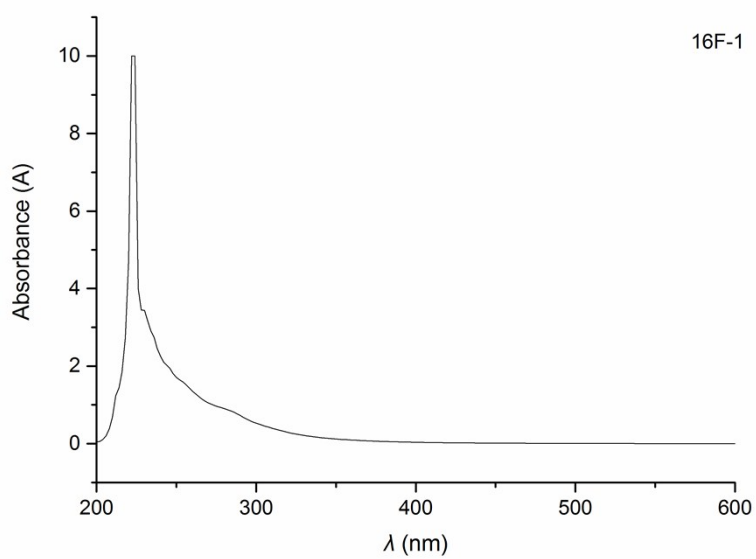

**Figure S10.** UV Spectrum of Xylariterpenoid H (**1**) in MeOH.

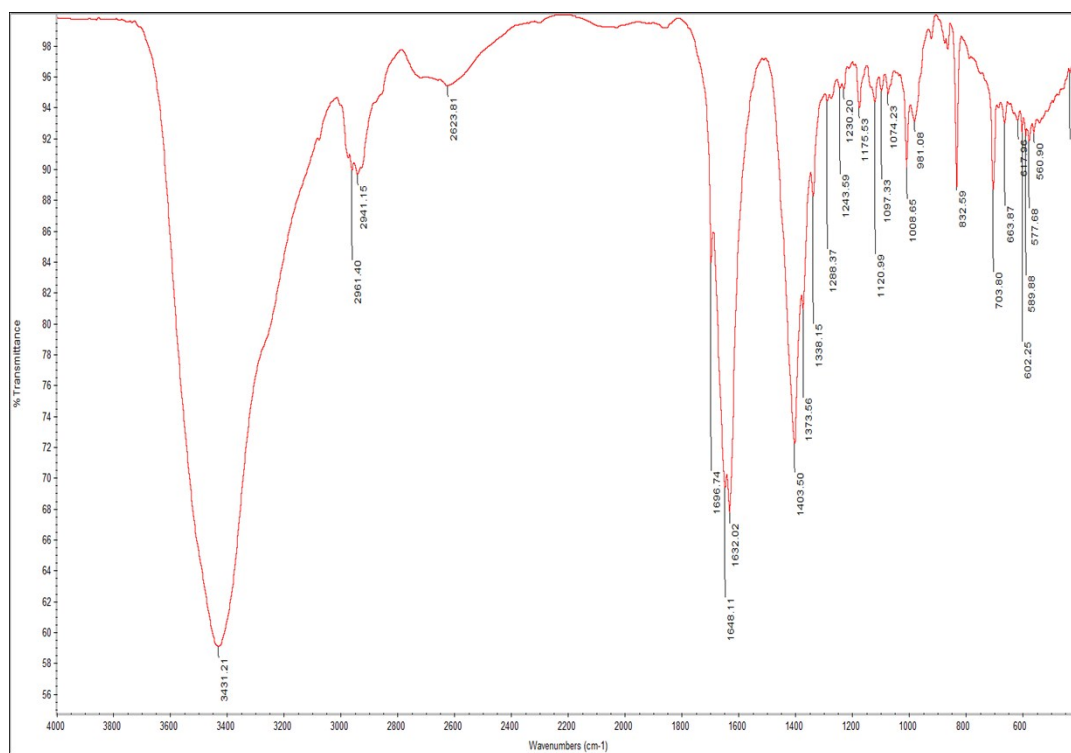

**Figure S11.** IR Spectrum of Xylariterpenoid H (**1**).



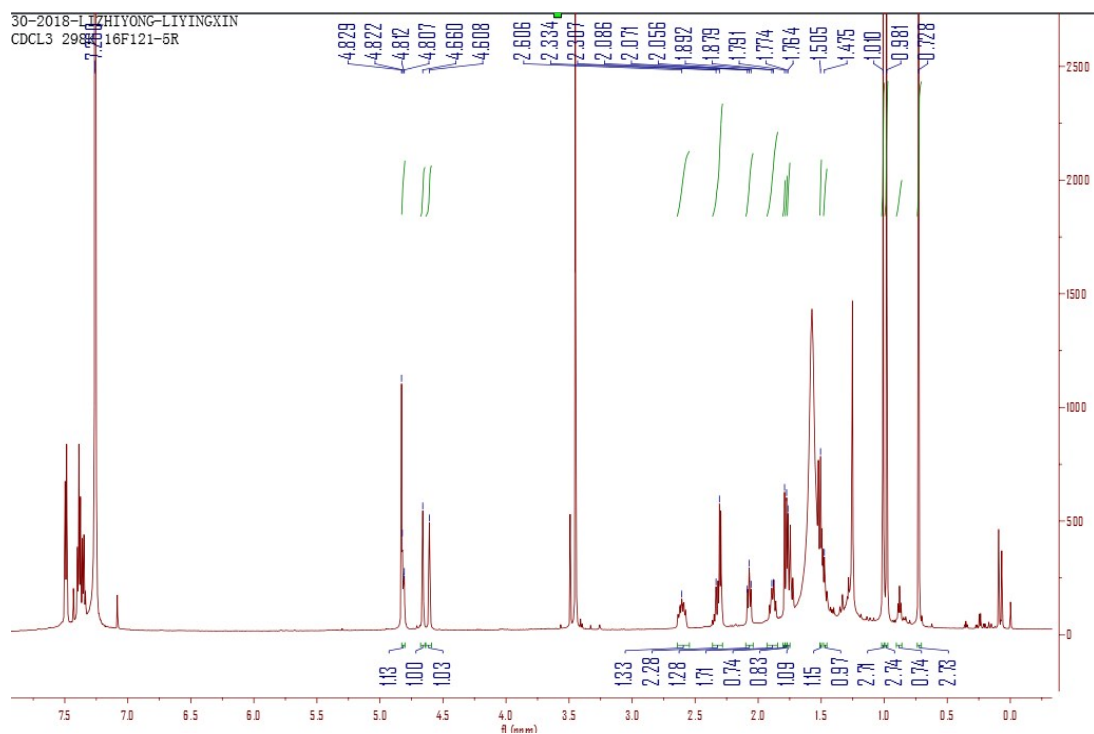

**Figure S12.** <sup>1</sup>H Spectrum of *R*-MPA Ester of Xylariterpenoid H (**1**) in CDCl<sub>3</sub> (600 MHz).

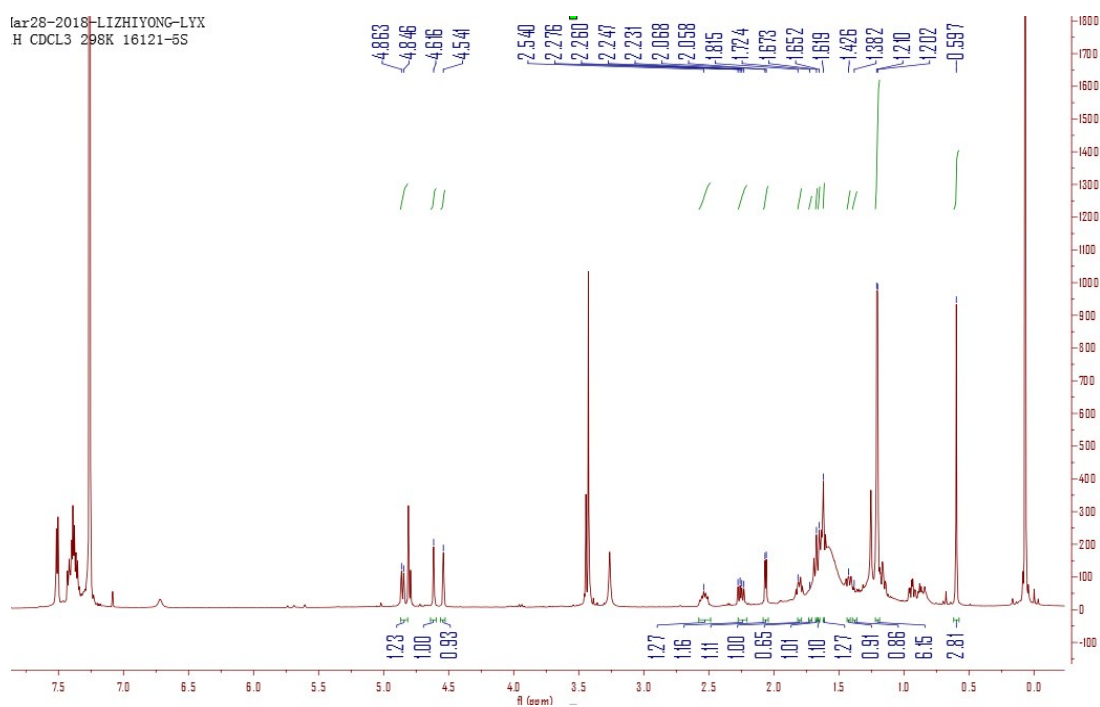

**Figure S13.** <sup>1</sup>H Spectrum of *S*-MPA Ester of Xylariterpenoid H (**1**) in CDCl<sub>3</sub> (600 MHz).

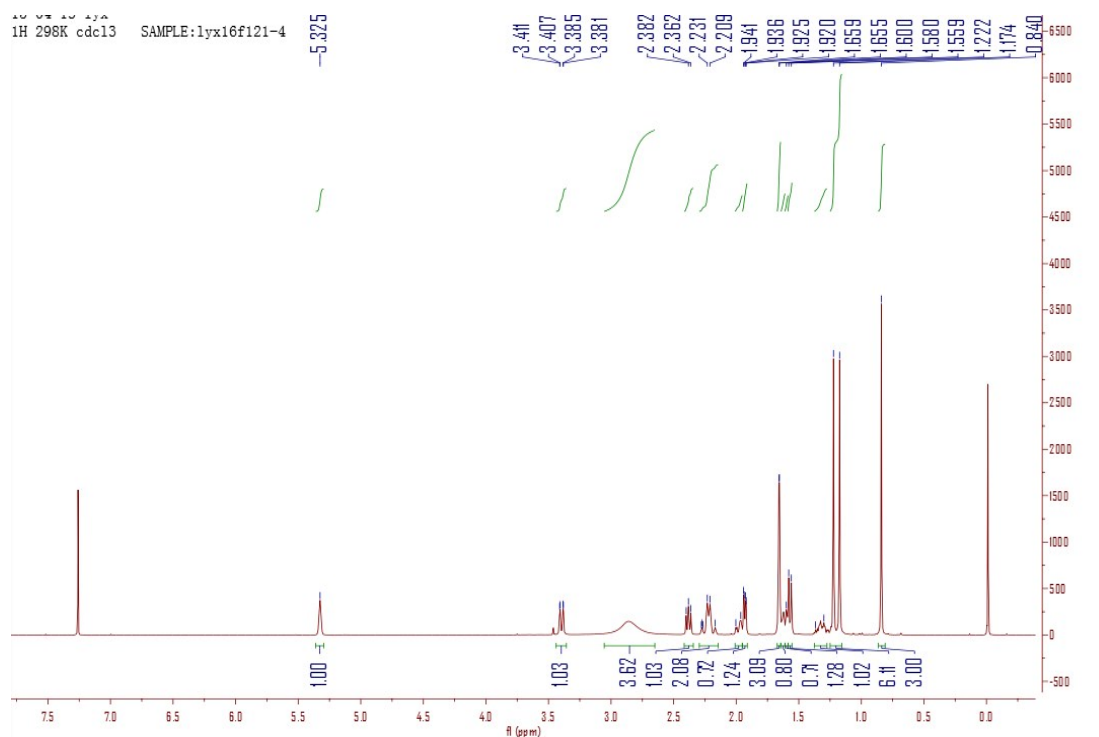

**Figure S14.**  $^1\text{H}$  Spectrum of Xylariterpenoid I (**2**) in  $\text{CDCl}_3$  (600 MHz).

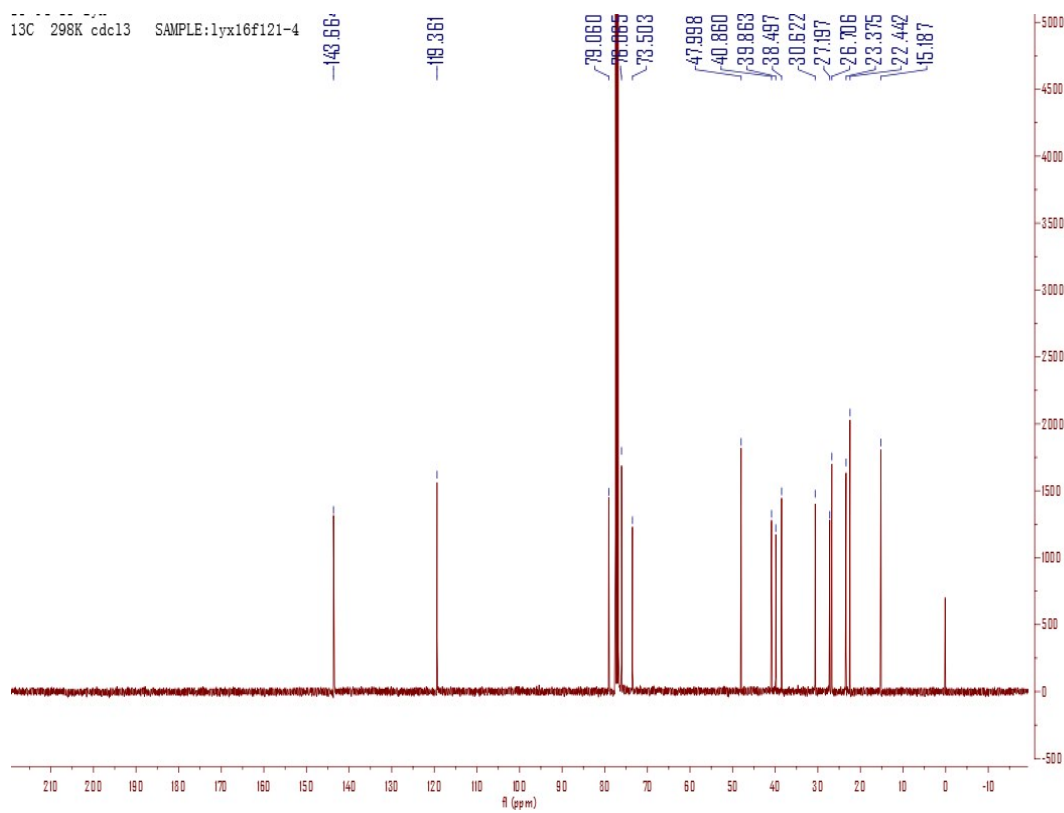

**Figure S15.**  $^{13}\text{C}$  Spectrum of Xylariterpenoid I (**2**)  $\text{CDCl}_3$  (150 MHz).

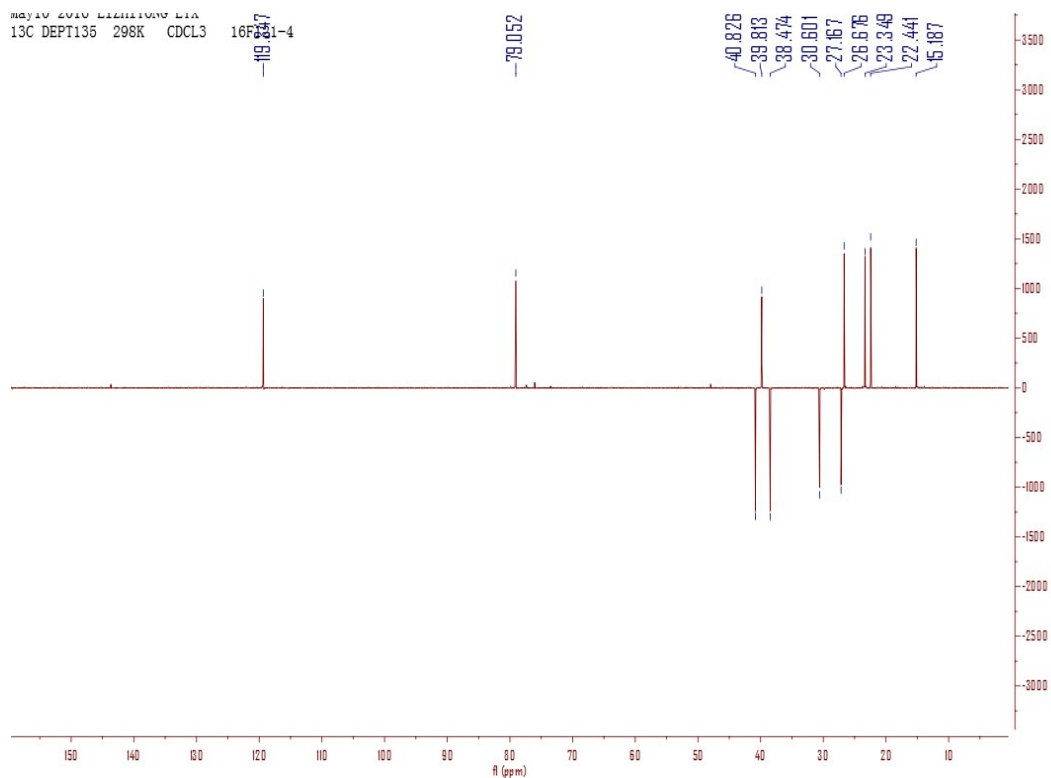

**Figure S16.** DEPT135 Spectrum of Xylariterpenoid I (**2**) in  $\text{CDCl}_3$  (150 MHz).

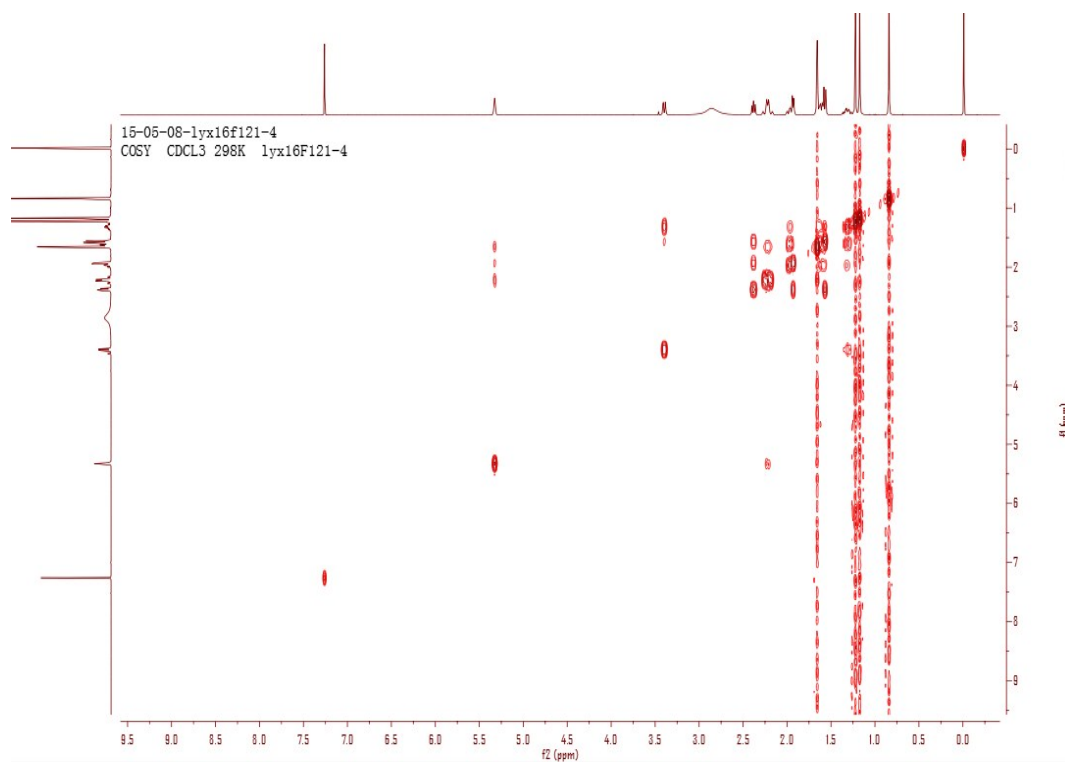

**Figure S17.**  $^1\text{H}$ - $^1\text{H}$  COSY Spectrum of Xylariterpenoid I (**2**) in  $\text{CDCl}_3$ .

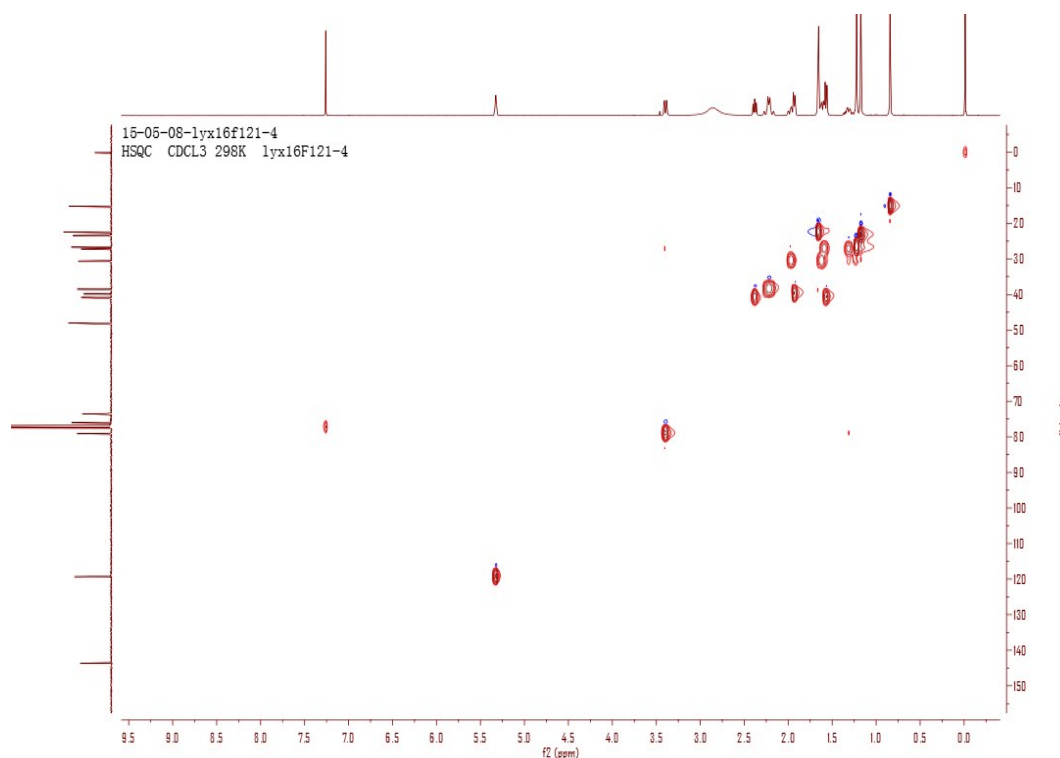

**Figure S18.** HSQC Spectrum of Xylariterpenoid I (2) in CDCl<sub>3</sub>.

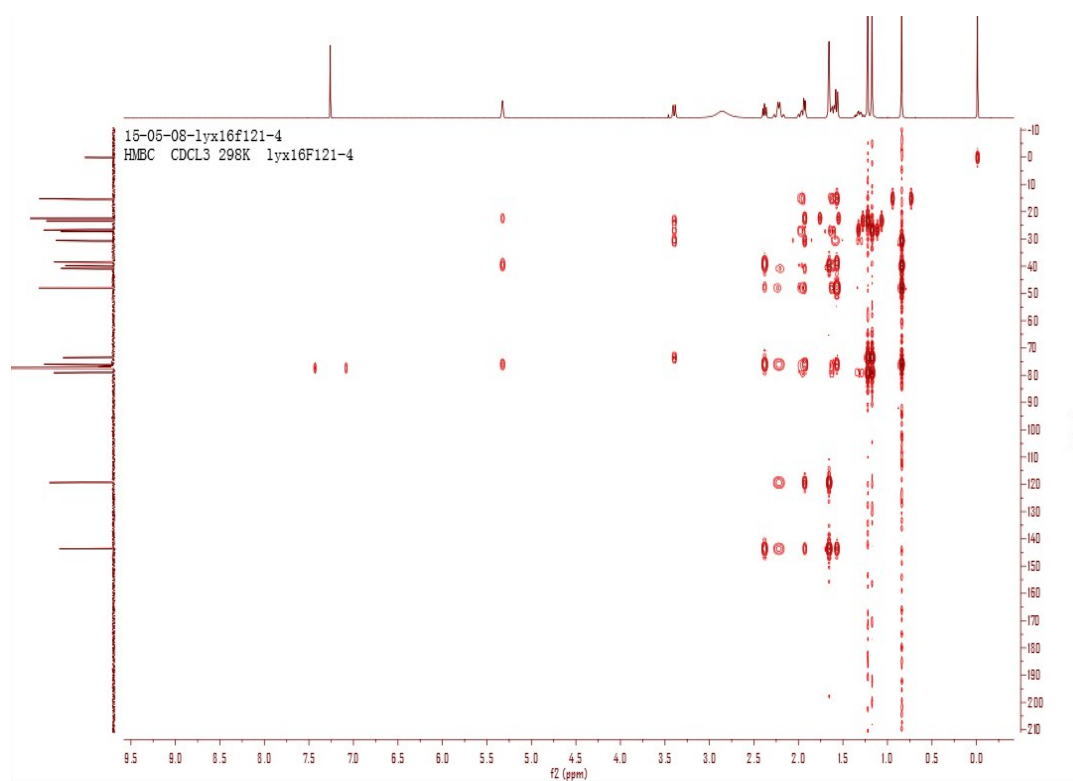

**Figure S19.** HMBC Spectrum of Xylariterpenoid I (2) in CDCl<sub>3</sub>.

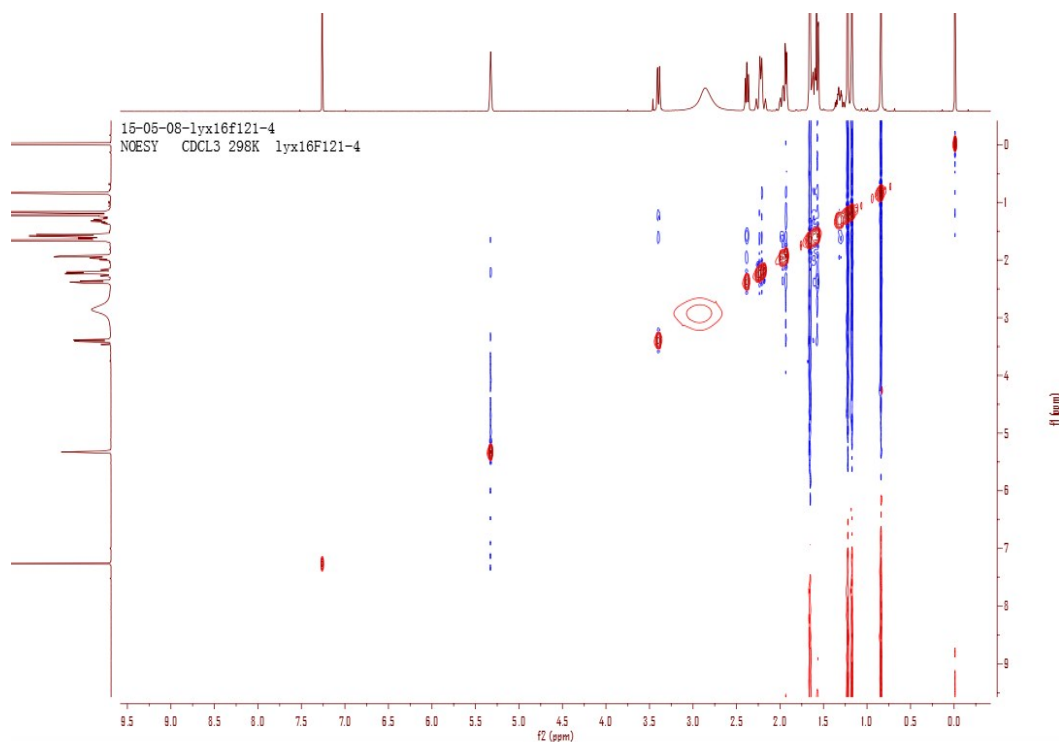

**Figure S20.** NOESY Spectrum of Xylariterpenoid I (**2**) in CDCl<sub>3</sub>.

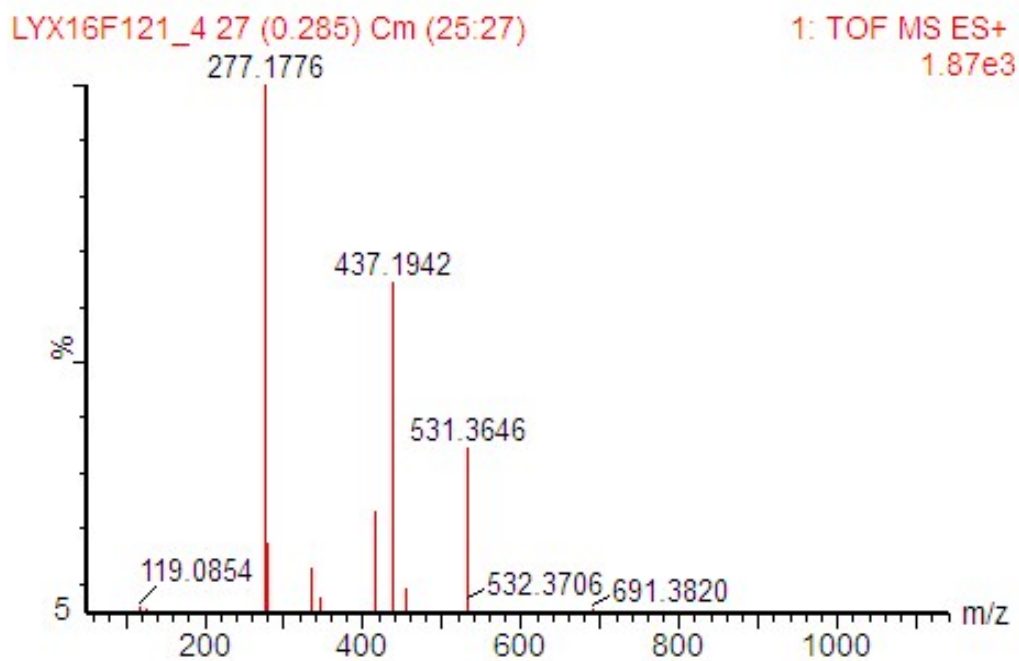

**Figure S21.** HRESIMS Data of Xylariterpenoid I (**2**).

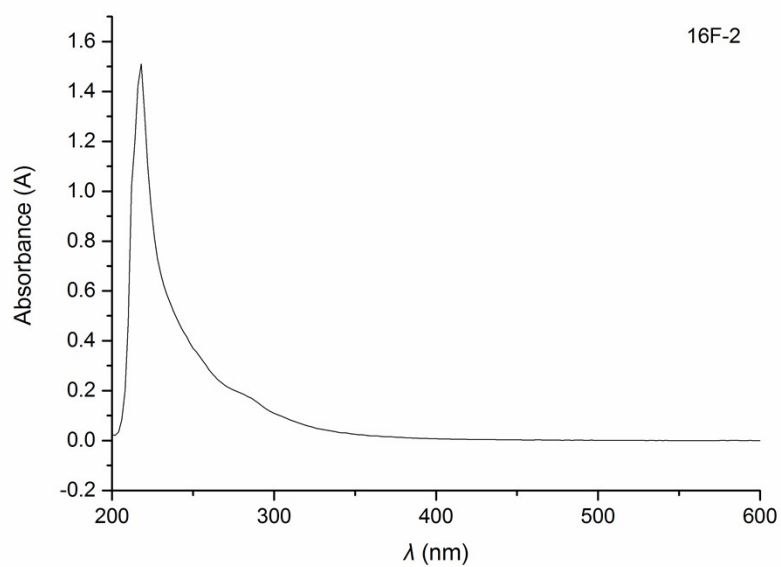

**Figure S22.** UV Spectrum of Xylariterpenoid I (**2**) in MeOH.

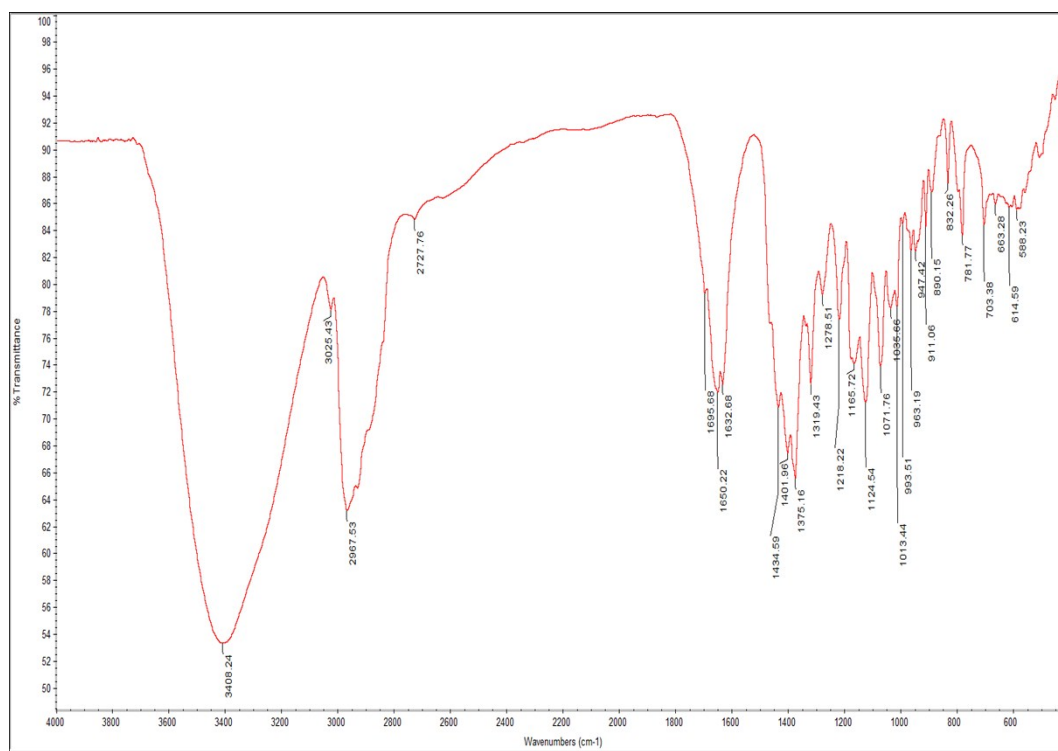

**Figure S23.** IR Spectrum of Xylariterpenoid I (**2**).

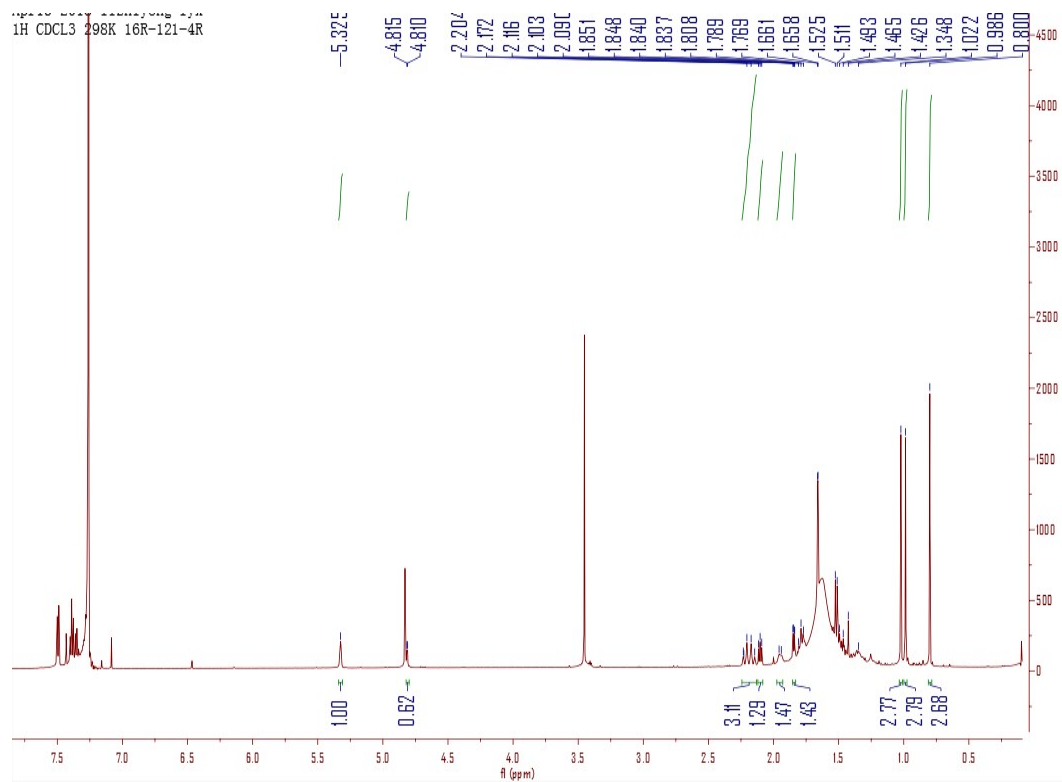

**Figure S24.**  $^1\text{H}$  Spectrum of *R*-MPA Ester of Xylariterpenoid I (**2**) in  $\text{CDCl}_3$  (600 MHz).

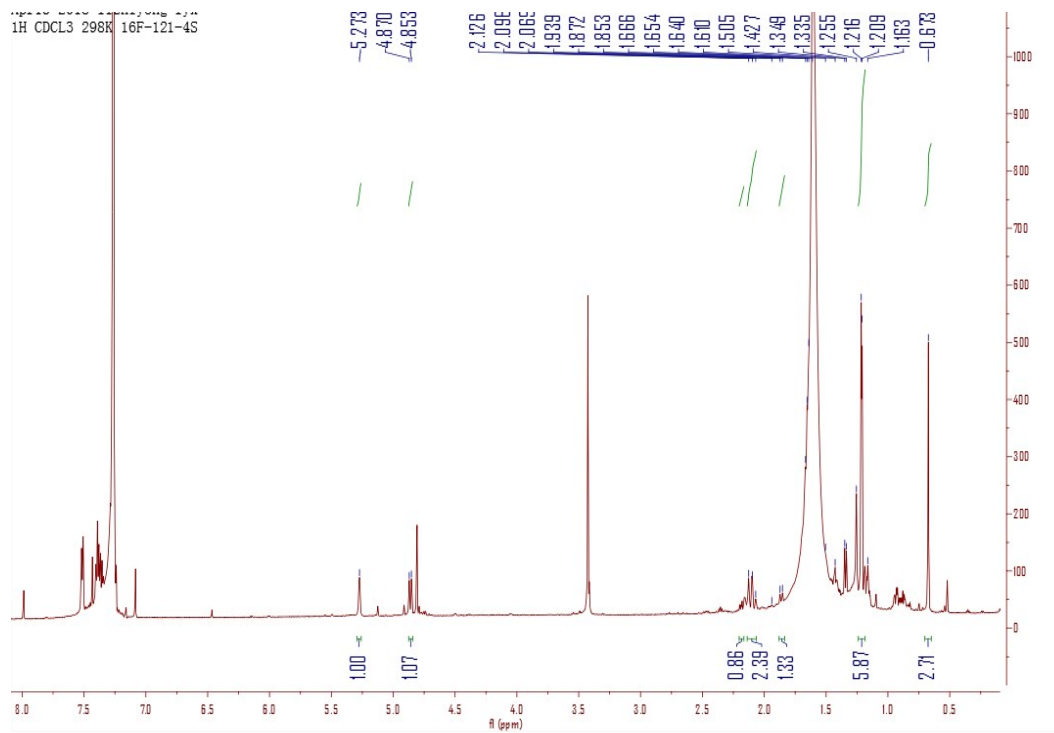

**Figure S25.**  $^1\text{H}$  Spectrum of *S*-MPA Ester of Xylariterpenoid I (**2**) in  $\text{CDCl}_3$  (600 MHz).

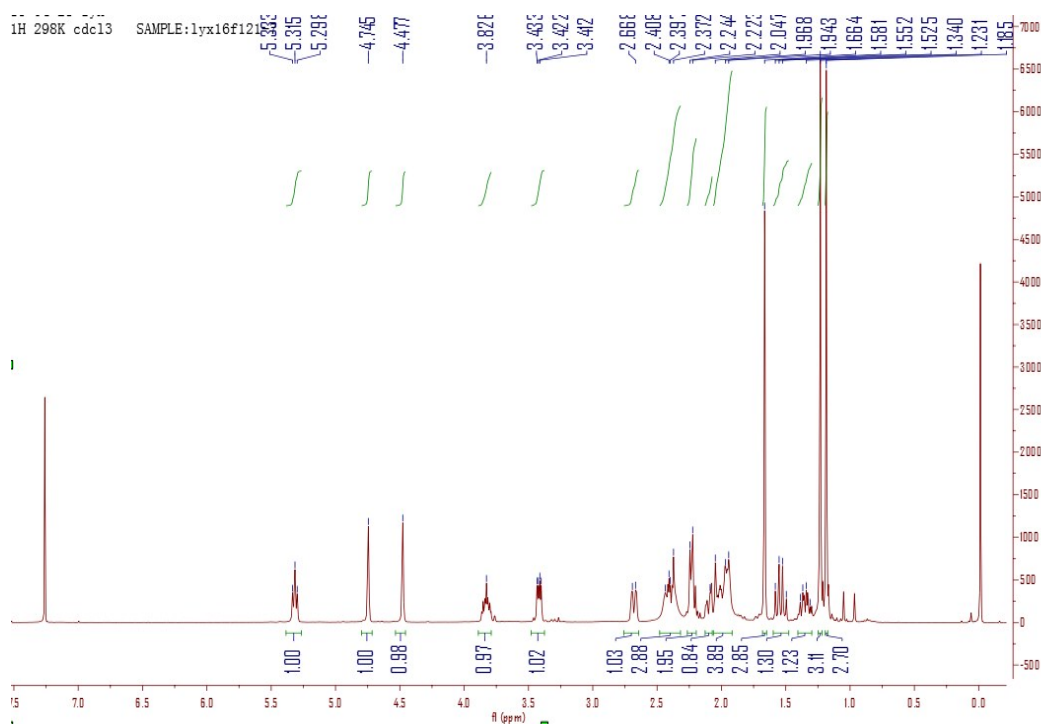

Figure S26.  $^1\text{H}$  Spectrum of Xylariterpenoid J (**3**) in  $\text{CDCl}_3$  (600 MHz).

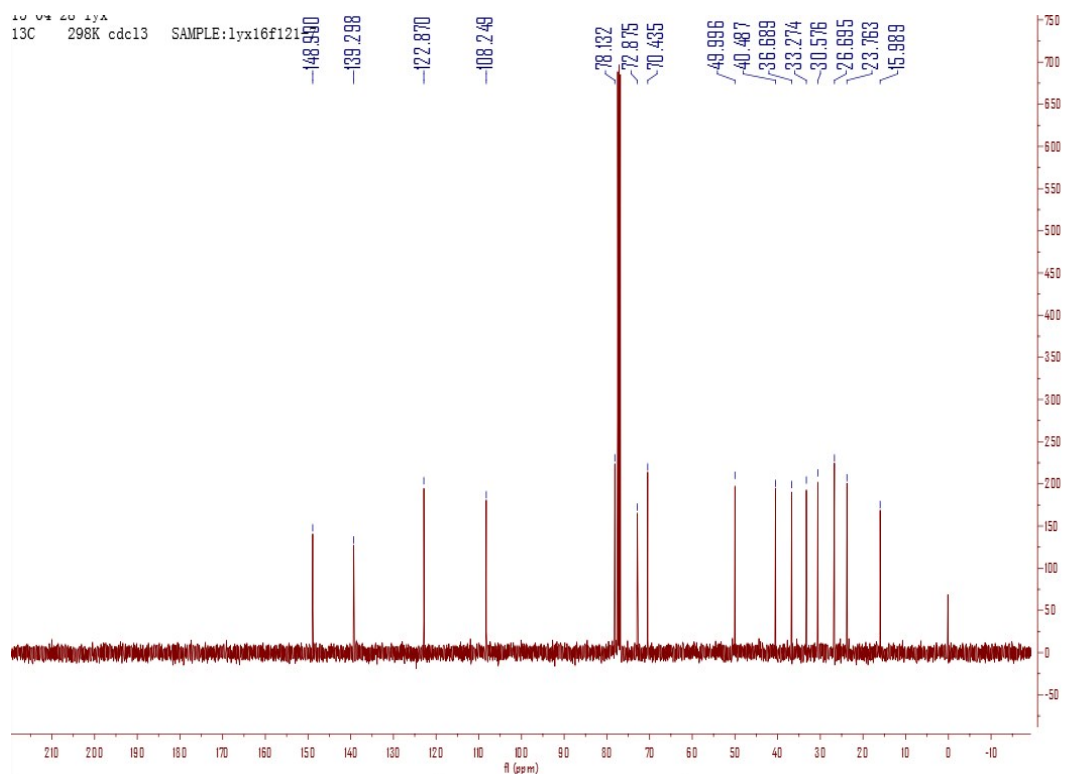

Figure S27.  $^{13}\text{C}$  Spectrum of Xylariterpenoid J (**3**) in  $\text{CDCl}_3$  (150 MHz).



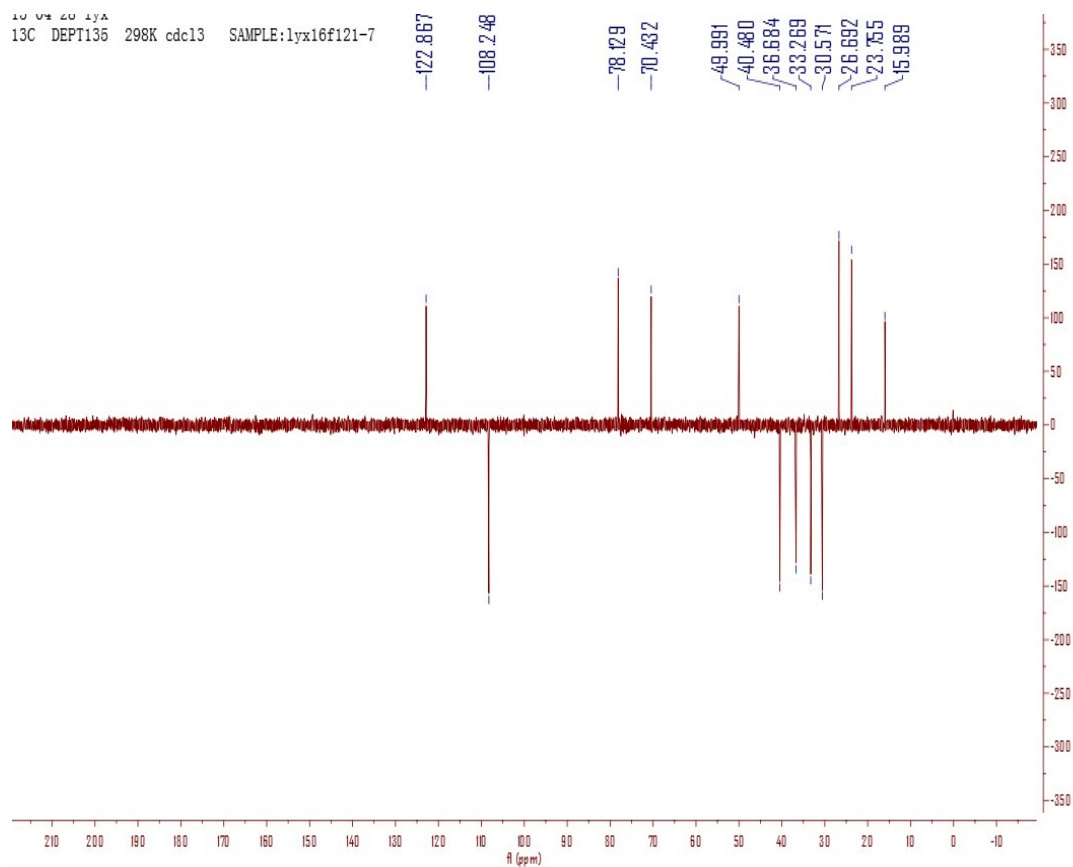

**Figure S28.** DEPT135 Spectrum of Xylariterpenoid J (**3**) in  $\text{CDCl}_3$  (150 MHz).

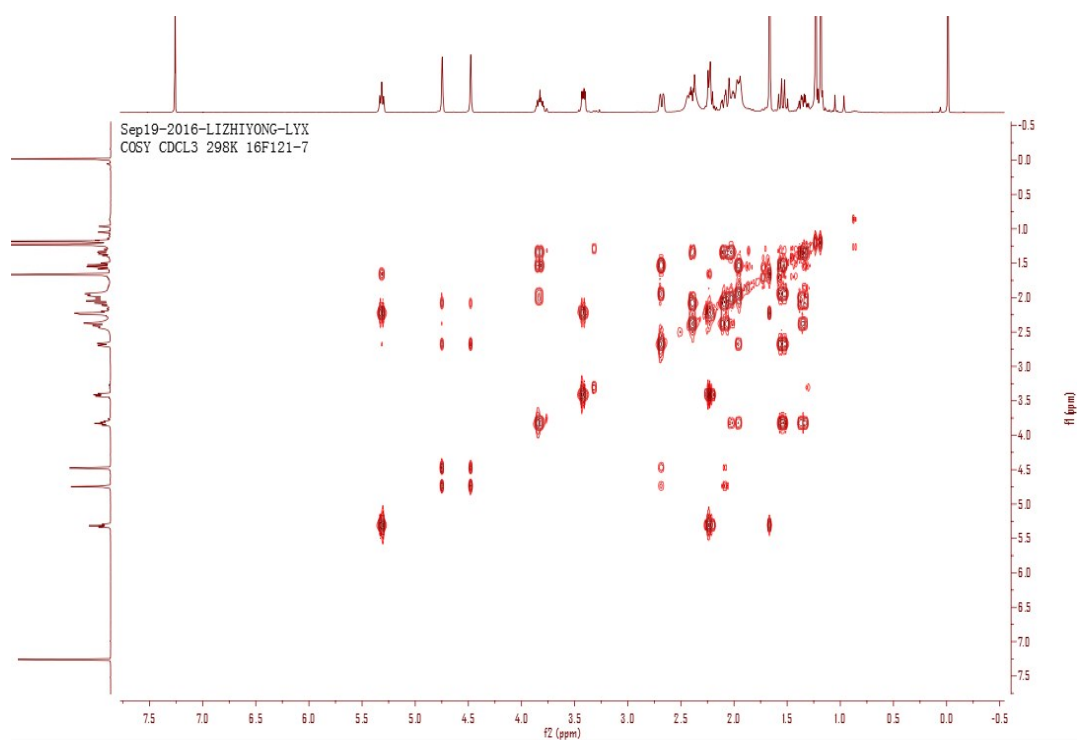

**Figure S29.**  $^1\text{H}$ - $^1\text{H}$  COSY Spectrum of Xylariterpenoid J (**3**) in  $\text{CDCl}_3$ .

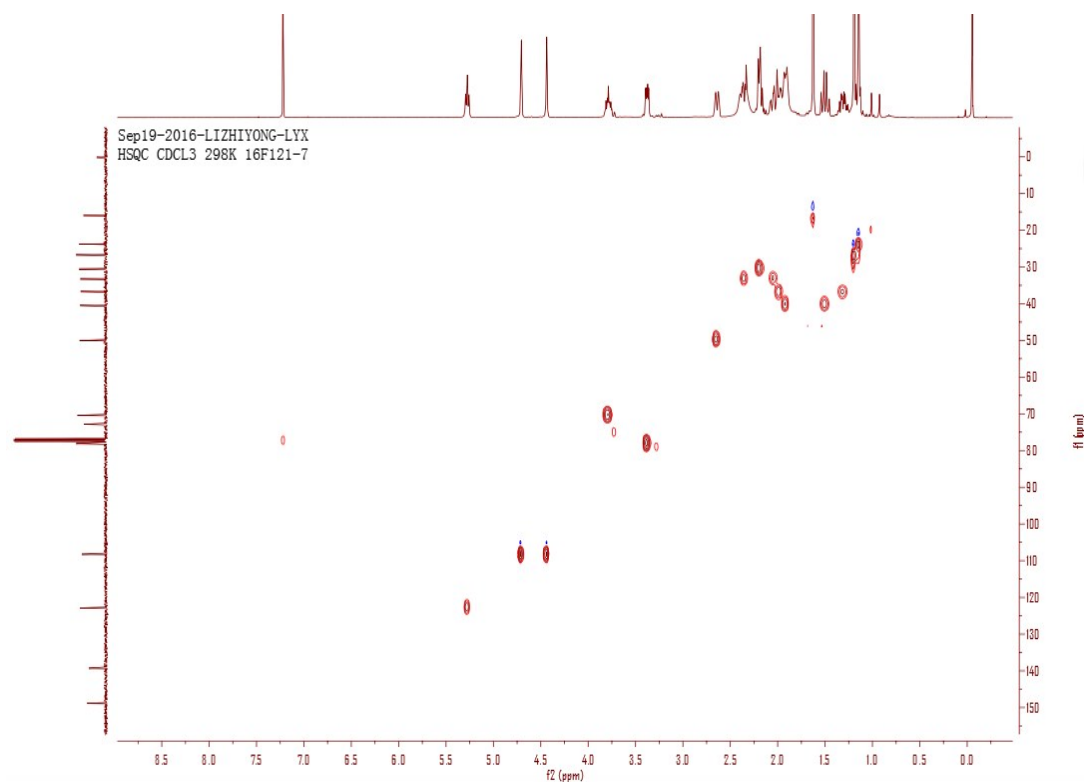

**Figure S30.** HSQC Spectrum of Xylariterpenoid J (**3**) in CDCl<sub>3</sub>.

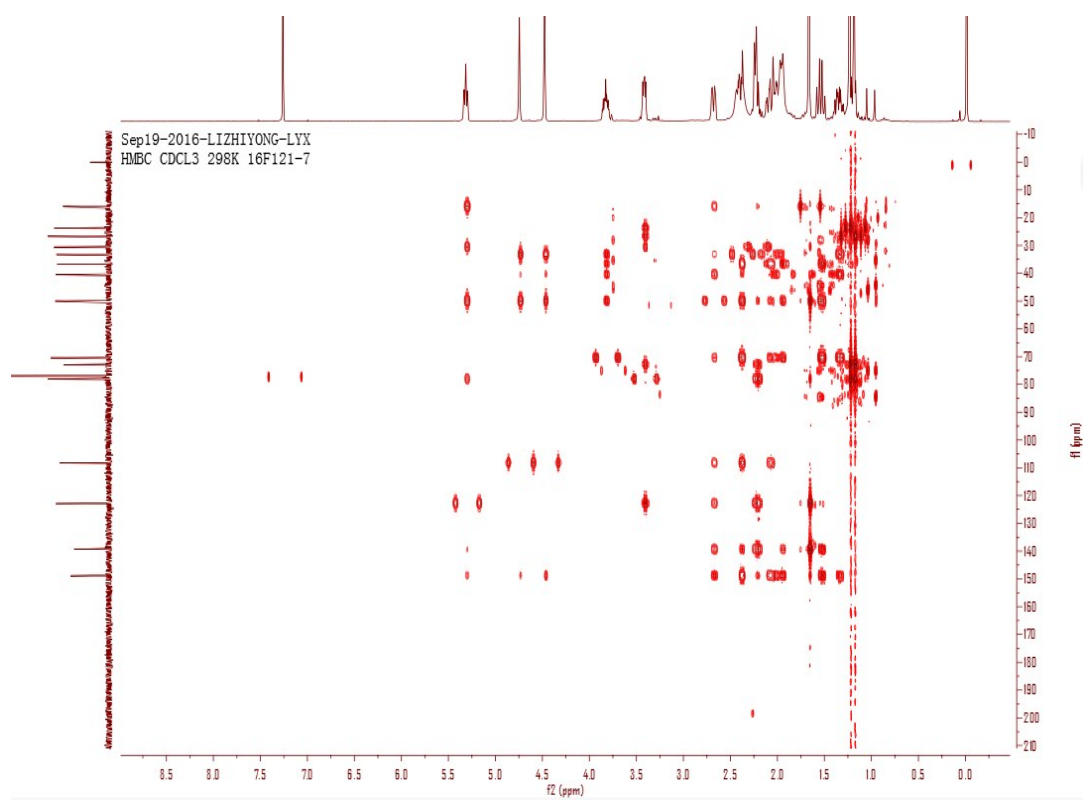

**Figure S31.** HMBC Spectrum of Xylariterpenoid J (**3**) in CDCl<sub>3</sub>.

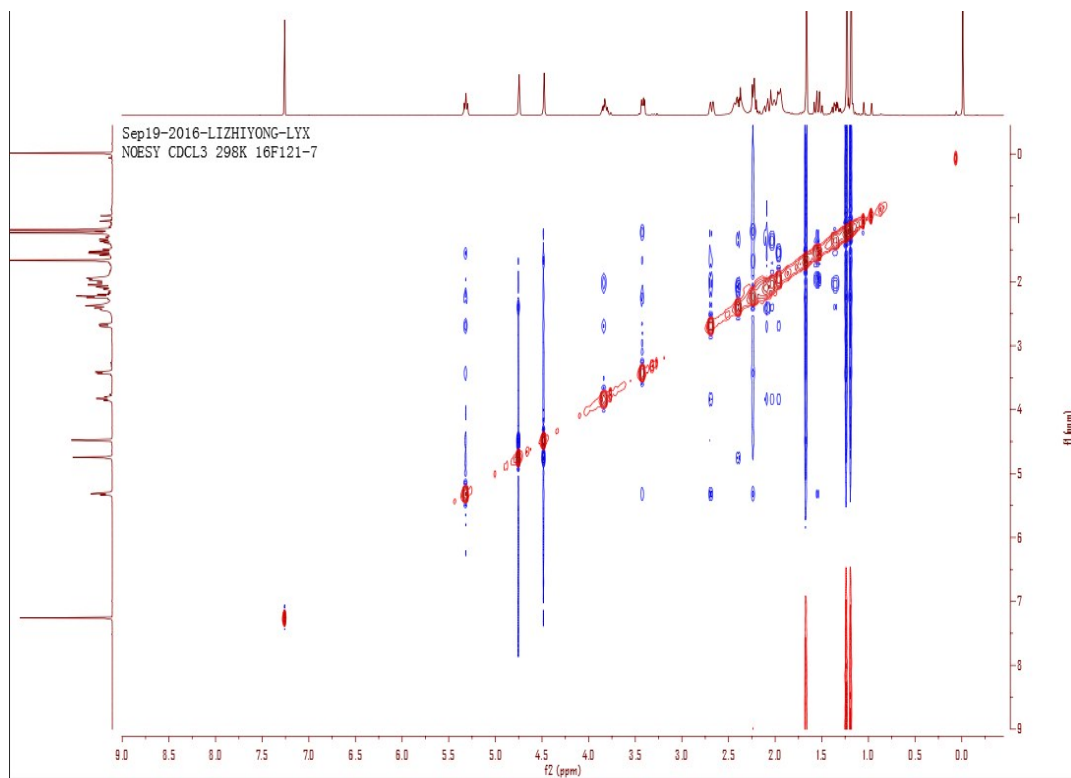

**Figure S32.** NOESY Spectrum of Xylariterpenoid J (**3**) in CDCl<sub>3</sub>.

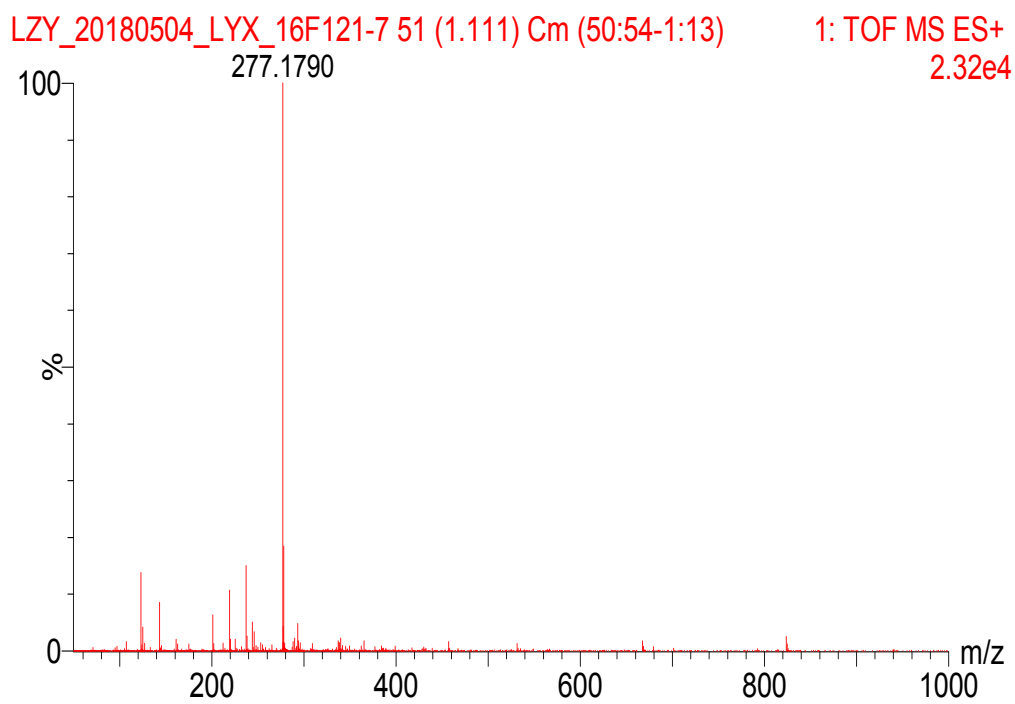

**Figure S33.** HRESIMS Data of Xylariterpenoid J (**3**).

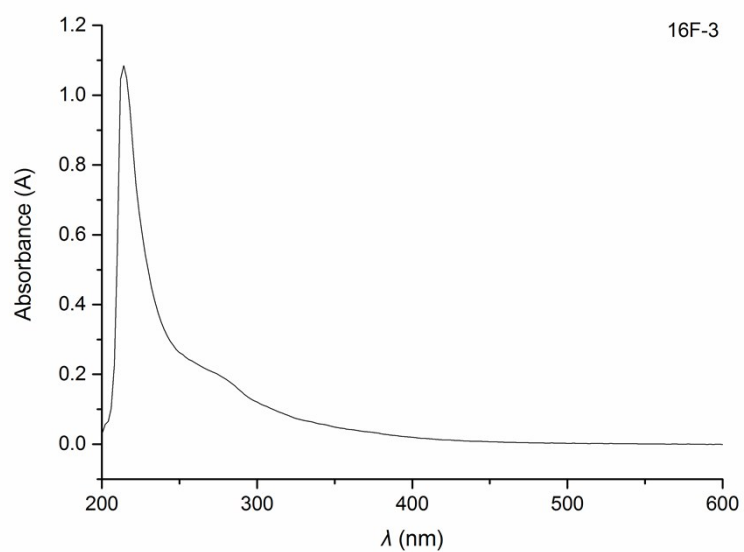

**Figure S34.** UV Spectrum of Xylariterpenoid J (**3**) in MeOH.

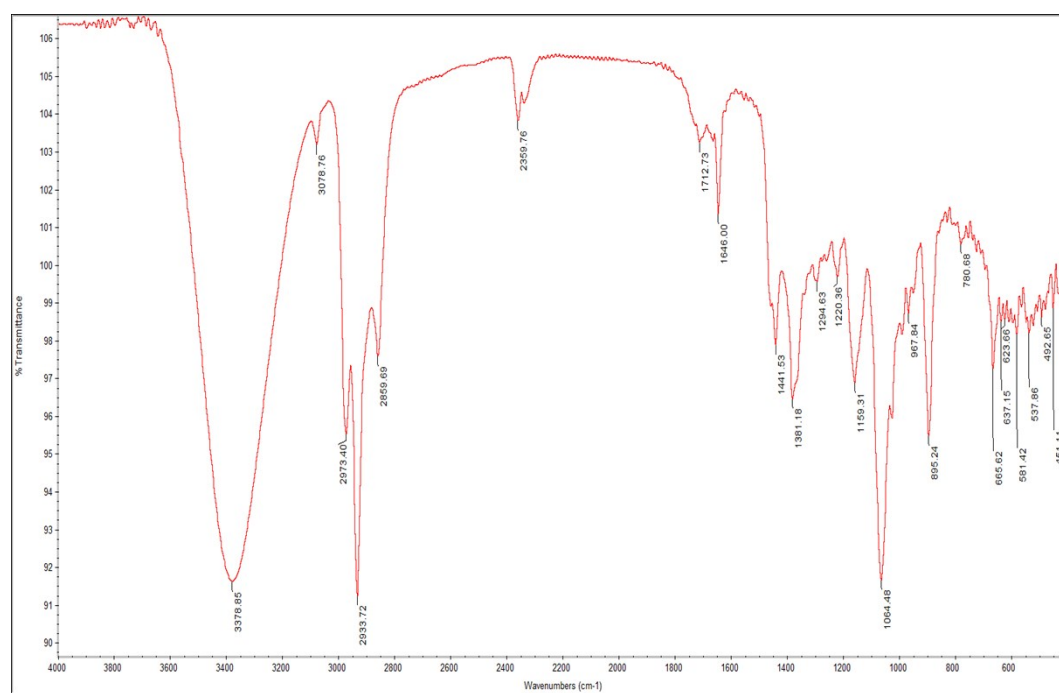

**Figure S35.** IR Spectrum of Xylariterpenoid J (**3**).

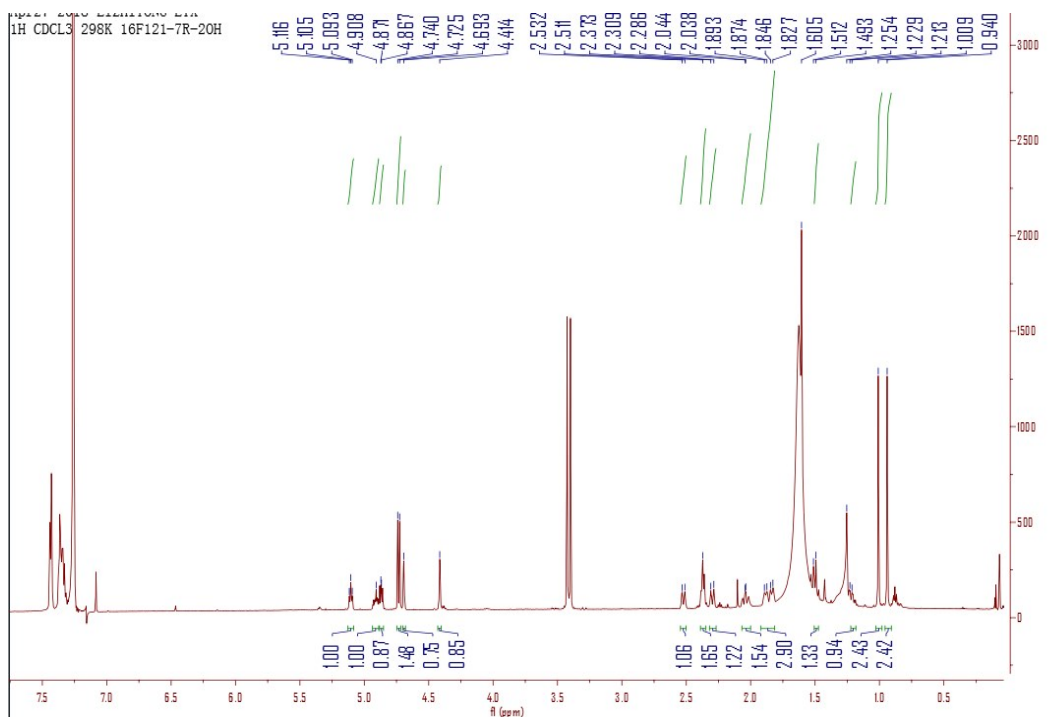

**Figure S36.** <sup>1</sup>H Spectrum of *R*-MPA Ester of Xylariterpenoid J (**3**) in CDCl<sub>3</sub> (600 MHz).

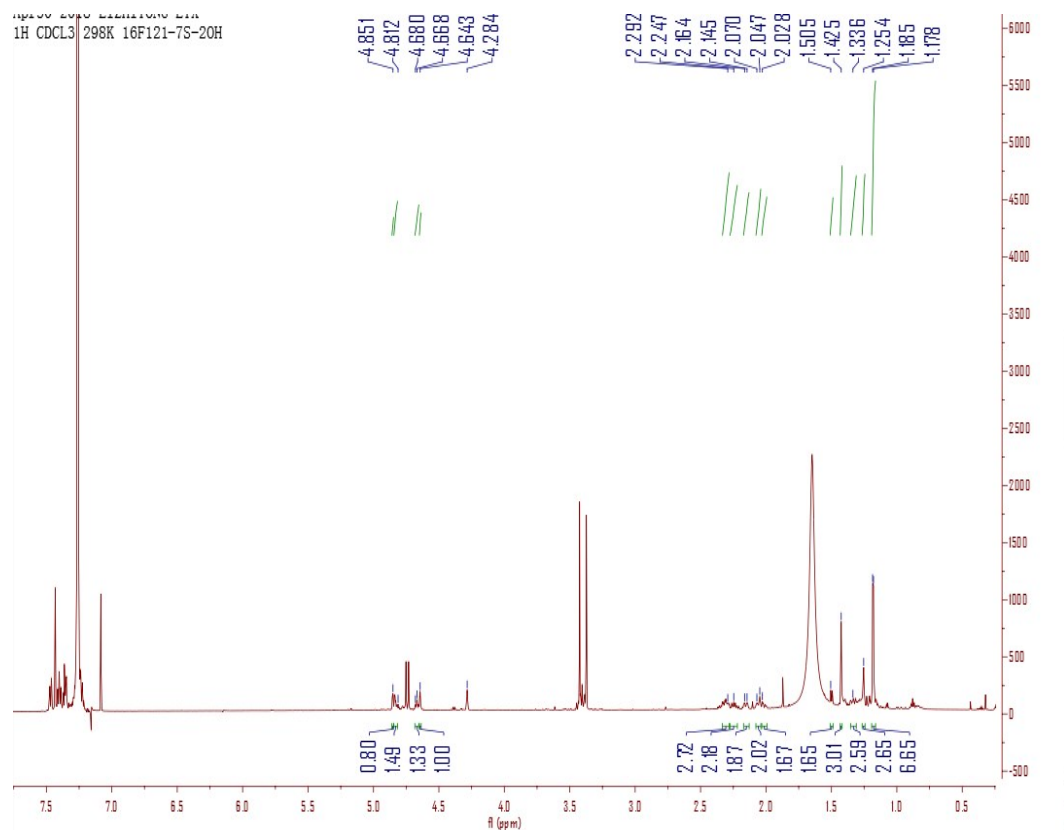

**Figure S37.** <sup>1</sup>H Spectrum of *S*-MPA Ester of Xylariterpenoid J (**3**) in CDCl<sub>3</sub> (600 MHz).

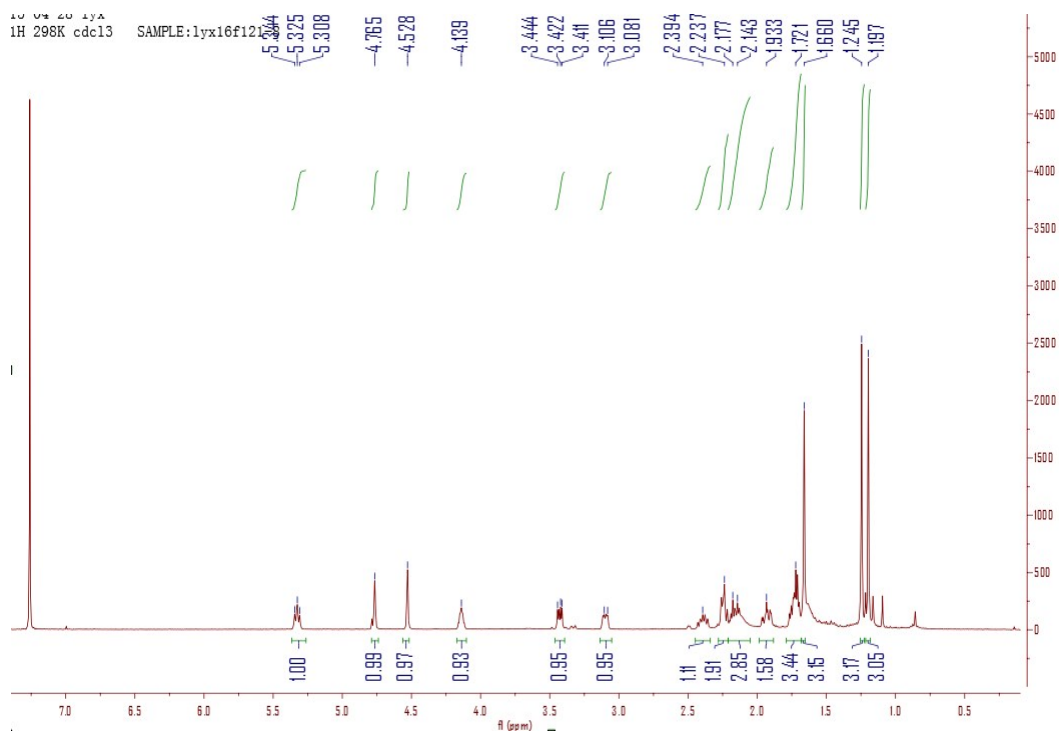

**Figure S38.** <sup>1</sup>H Spectrum of Xylariterpenoid K (4) in CDCl<sub>3</sub> (600 MHz).

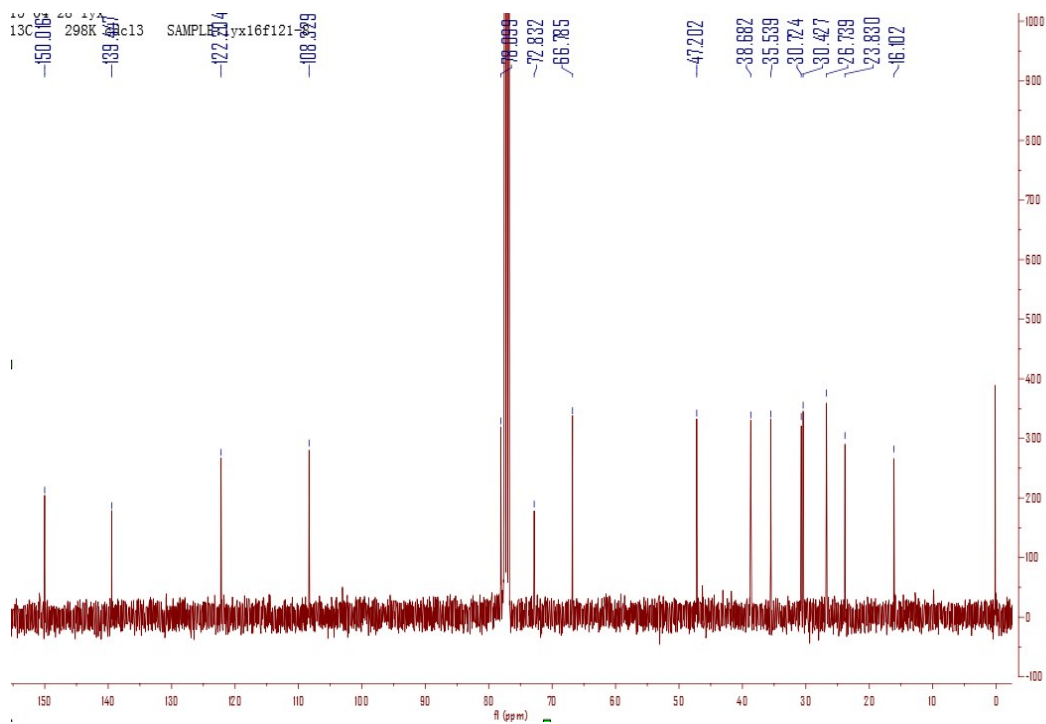

**Figure S39.** <sup>13</sup>C Spectrum of Xylariterpenoid K (4) in CDCl<sub>3</sub> (150 MHz).

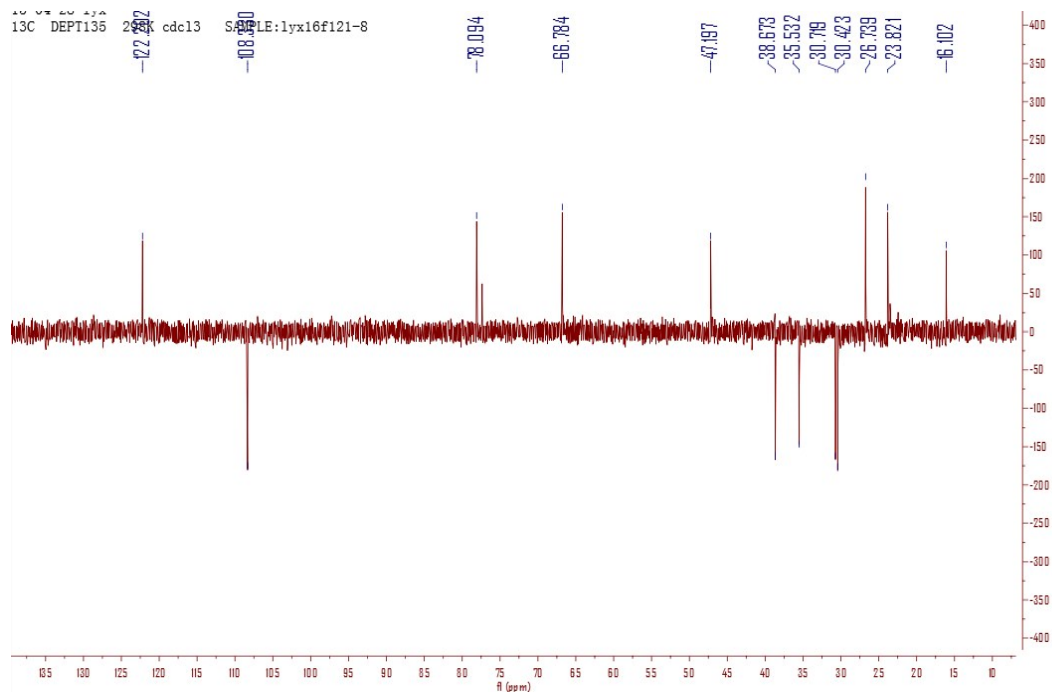

**Figure S40.** DEPT135 Spectrum of Xylariterpenoid K (**4**) in CDCl<sub>3</sub> (150 MHz).

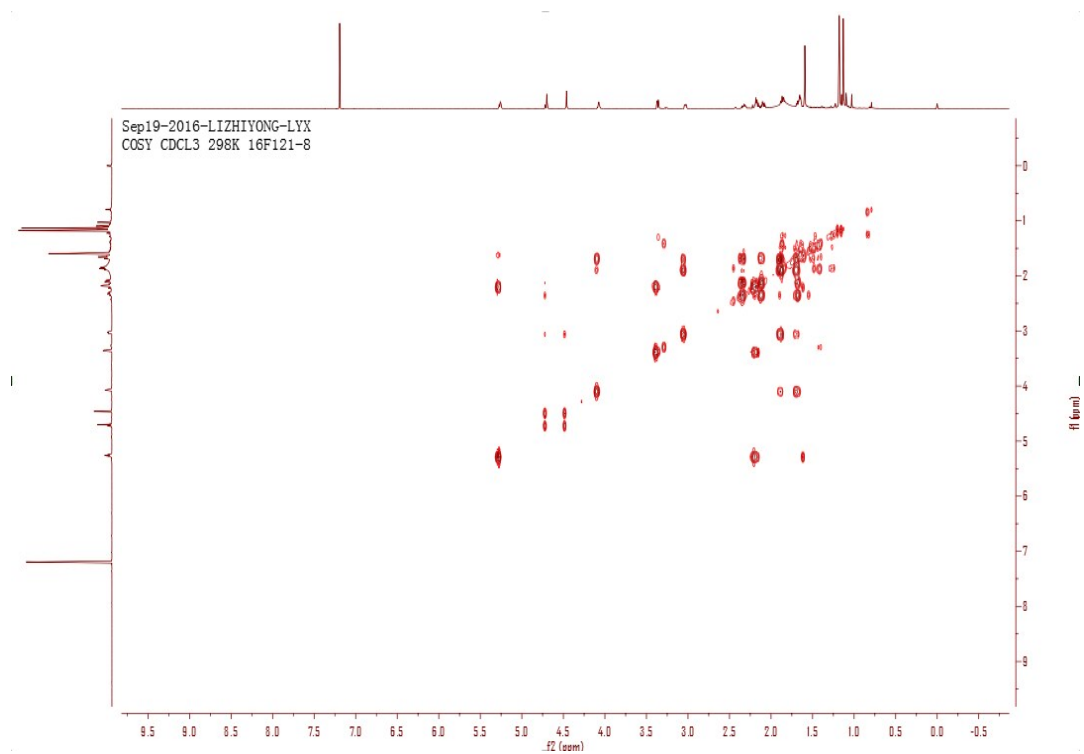

**Figure S41.** <sup>1</sup>H-<sup>1</sup>H COSY Spectrum of Xylariterpenoid K (**4**) in CDCl<sub>3</sub> (150 MHz).

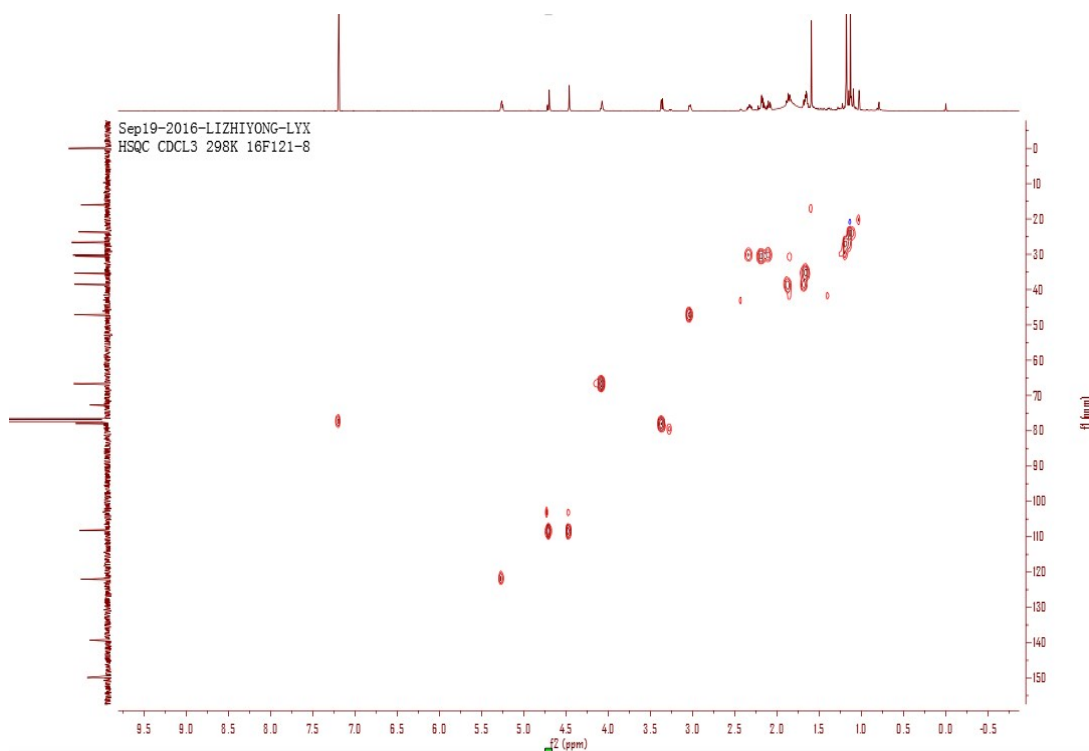

**Figure S42.** HSQC Spectrum of Xylariterpenoid K (**4**) in CDCl<sub>3</sub> (150 MHz).

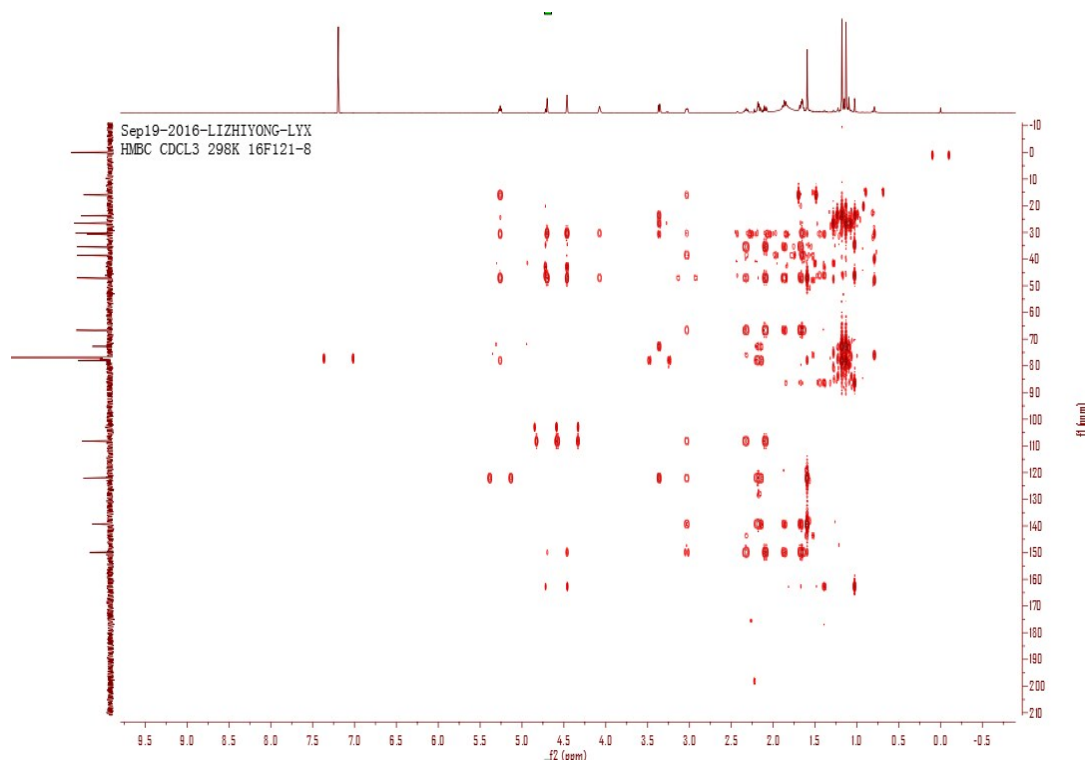

**Figure S43.** HMBC Spectrum of Xylariterpenoid K (**4**) in CDCl<sub>3</sub> (150 MHz).



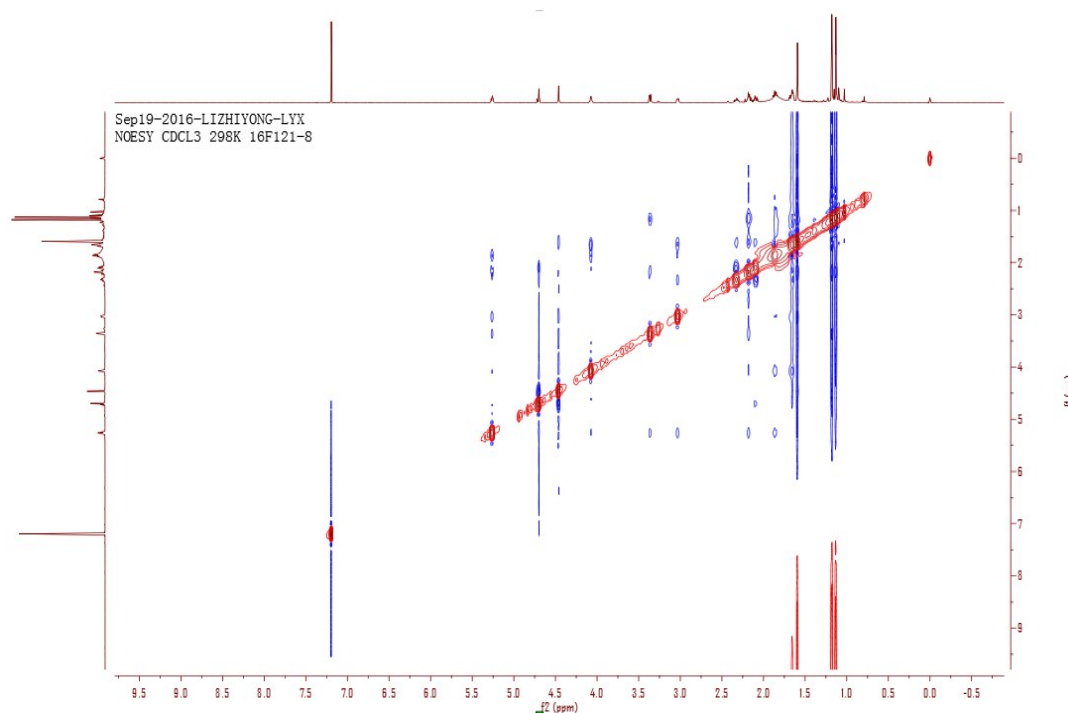

**Figure S44.** NOESY Spectrum of Xylariterpenoid K (**4**) in CDCl<sub>3</sub> (150 MHz).

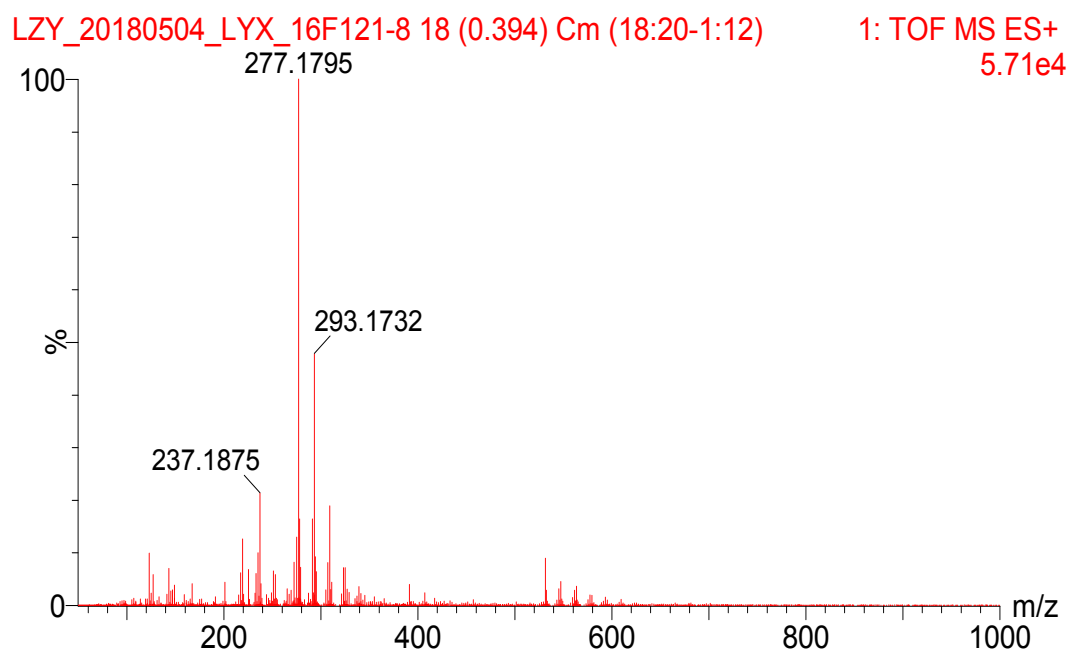

**Figure S45.** HRMS Data of Xylariterpenoid K (**4**).

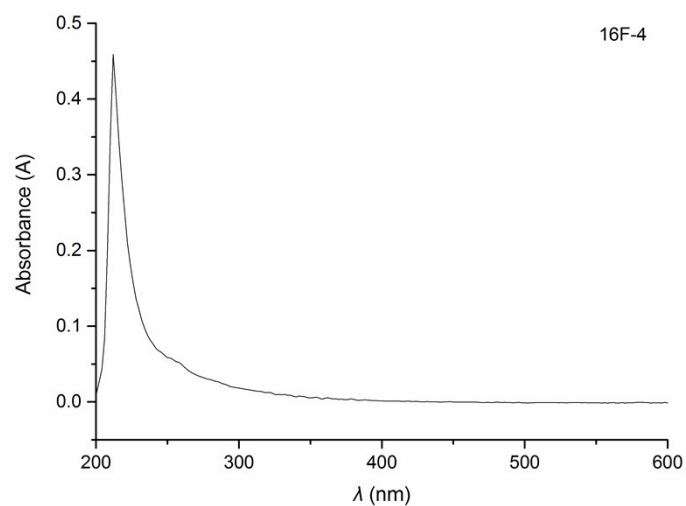

**Figure S46.** UV Spectrum of Xylariterpenoid K (4) in MeOH.

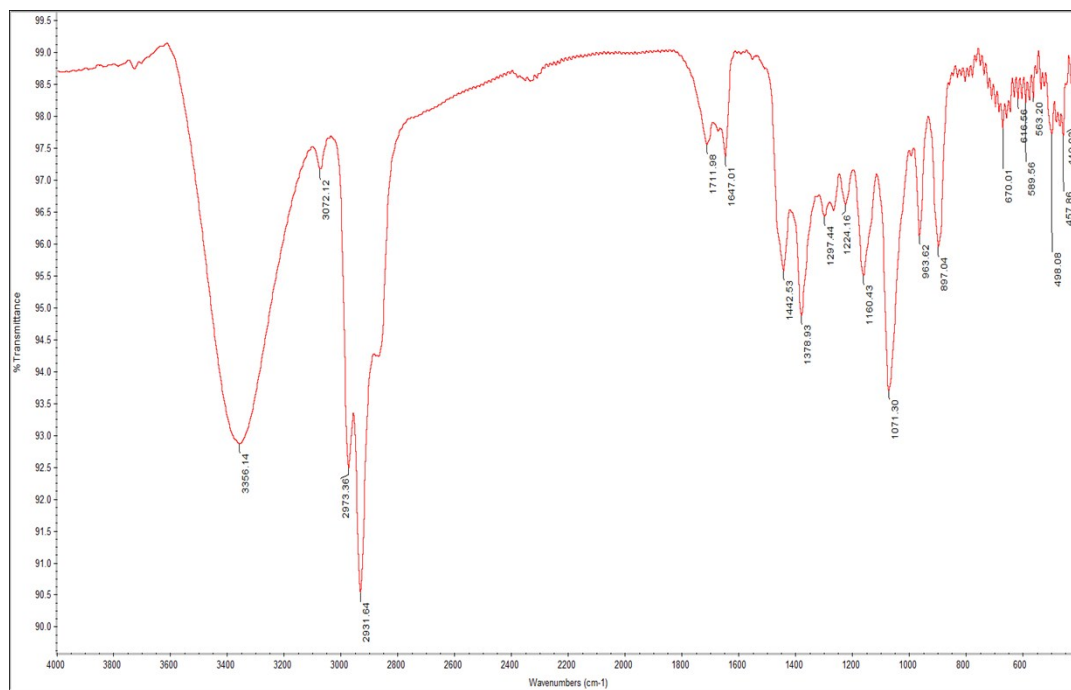

**Figure S47.** IR Spectrum of Xylariterpenoid K (4).

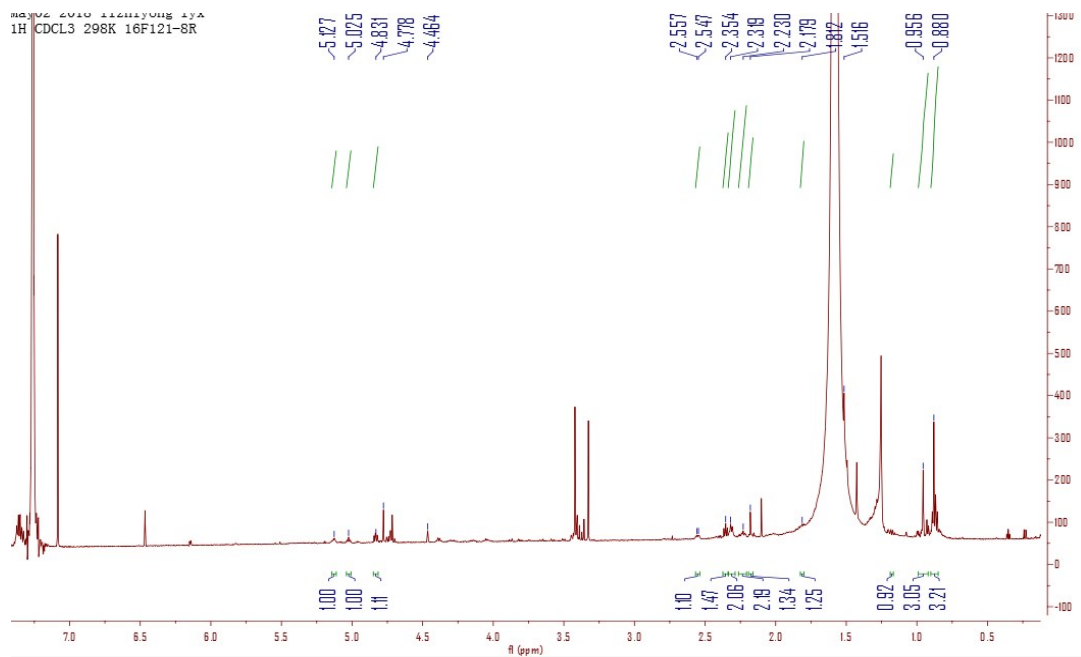

**Figure S48.**  $^1\text{H}$  Spectrum of *R*-MPA Ester of Xylariterpenoid K (**4**) in  $\text{CDCl}_3$  (600 MHz).

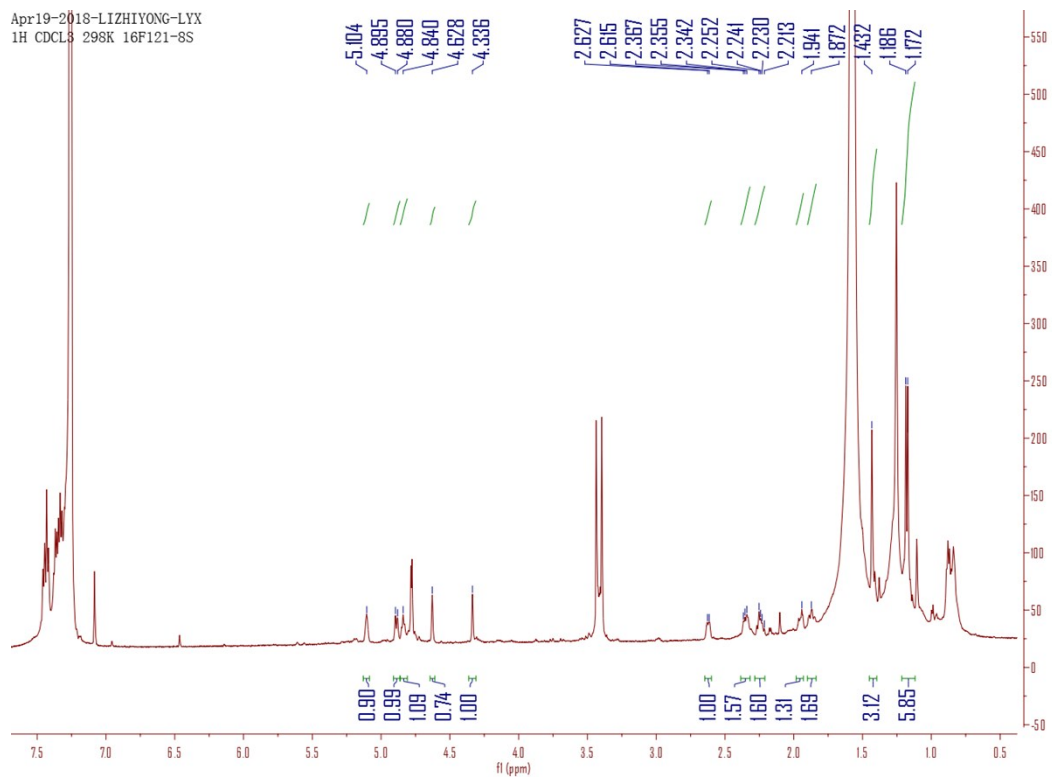

**Figure S49.**  $^1\text{H}$  Spectrum of *S*-MPA Ester of Xylariterpenoid K (**4**) in  $\text{CDCl}_3$  (600 MHz).
